# Supplementary material for: Effectiveness and computational efficiency of absorbing boundary conditions for full-waveform inversion
Source: Copernicus journal article supplement (doi:10.5194/gmd-2022-48), 2022-03-31
Supplement: Supplementary file [file diff.pdf › rc1/diff.pdf]

# Effectiveness and computational efficiency of absorbing boundary conditions for full-waveform inversion

Daiane Iglesia Dolci<sup>1</sup>, Felipe A. G. Silva<sup>2</sup>, Pedro S. Peixoto<sup>2</sup>, and Ernani V. Volpe<sup>1</sup>

<sup>1</sup>Department of Mechanical Engineering, Escola Politécnica, University of São Paulo. Av. Prof. Mello Moraes, 2231, São Paulo, SP, 05508-030, Brazil.

<sup>2</sup>Department of Applied Mathematics, Institute of Mathematics and Statistics, University of São Paulo. Rua do Matão, 1010, São Paulo, SP, 05508-090, Brazil.

**Correspondence:** Daiane Iglesia Dolci (dolci@usp.br)

**Abstract.** Full-Waveform Inversion (FWI) is a high-resolution numerical technique for seismic waves used to estimate the physical characteristics of a subsurface region. The continuous problem involves solving an inverse problem on an infinite domain, which is impractical from a computational perspective. In limited area models, absorbing boundaries conditions (ABCs) are usually imposed, to avoid wave reflections. Several relevant ABCs have been proposed, with extensive literature on their effectiveness on the direct wave problem. Here, we investigate and compare the theoretical and computational characteristics of several ABCs in the full inverse problem. After a brief review of the most widely used ABCs, we derive their formulations in their respective adjoint problems. The different ABCs are implemented in a highly optimized domain specific language (~~ELSDSL~~) computational framework, Devito, which ~~targets seismic modeling is primarily used for seismic modelling~~ problems. We evaluate the effectiveness, computational efficiency and memory requirements of the ABC methods, considering from simple models to realistic ones. Our findings reveal that, even though the popular Perfectly Matching Layers (PMLs) are effective on avoiding wave reflections on the boundaries, they can be computationally more demanding than less used Hybrid ABCs. We show here that a proposed Hybrid ABC formulation, with nested Higdon's boundary conditions, is the most cost-effective method among the methods considered here, being as effective, or more, as PML and other schemes, but being computationally more efficient.

*Keywords:* full-waveform inversion, seismic waves, absorbing boundary conditions, domain specific language

## 1 Introduction

Firstly presented for acoustic waves (Tarantola, 1984), and later extended for the elastic (Tarantola, 1986; Mora, 1987) and viscoelastic cases (Tarantola, 1988), Full Waveform Inversion (FWI) is a high-resolution seismic technique used to estimate the ~~psychical-physical~~ parameters in a subsurface region. It is a wave-equation based technique that searches for an optimal match between real and computed data. The former is recorded by receivers in the field, whereas the latter consists of computed estimates of propagated waves emitted by a specified wave source. The observed data at the receivers is subject to influences of the subsurface medium while waves propagate from the source. Synthetic data can be generated by propagating the source waves in an estimated medium, and, therefore, the minimization of the differences between the observed and synthetic data at

the receivers is a methodology to seek the medium properties of a region. The data difference is traditionally measured by a least-square misfit function (Tarantola, 1984), also referred to as objective functional. The search for a minimum of the misfit function can be performed by a gradient based optimization technique (Mora, 1987). An efficient means of computing the gradient is the adjoint method (Tarantola, 1984; A. Fichtner, 2006; Fichtner, 2010). This approach is characterized by being reverse in time, ~~where~~. To exemplify, for a least-square misfit function, the difference between the observed and synthetic data is back propagated in time from the receivers to the source of the waves. The back propagation requires saving the data of the wave equation solution ~~in every computational time step~~, thus meaning a high memory usage to solve a FWI problem. In addition, FWI has a high computational cost, due to the size of the systems to be solved, also due to the misfit minimization process, which may demand a substantial number of iterations to achieve satisfactory results (A. Fichtner, 2006; Virieux and Operto, 2009).

In computational procedures, the forward/adjoint waves are propagated in a limited region, which is different from the real case where wave propagation occurs in an unlimited medium. On limited domains, the computational boundaries can allow spurious wave reflections to appear, which means that nonphysical information will eventually reach receivers and influence the misfit function (Gao et al., 2017). To tackle this problem, the so-called Absorbing Boundary Conditions (ABC) have been a usual practice in FWI, as a means of reducing spurious boundary reflections.

In essence, ABCs entail ~~adding either adopting an absorbing pointwise boundary condition to the differential equation, or extending the domain to accommodate for an absorbing layer. In most cases, additional~~ terms to both the forward and adjoint operators, and/or a set of additional equations, are required to be solved together with the original ones. ~~It may also require extending the computational domain to accommodate for an absorbing layer.~~ The performance of ABC methods is generally assessed for the forward problem (Gao et al., 2017; Liu and Sen, 2010, 2012; Grote and Sim, 2010). Such analysis is certainly relevant for FWI, since the forward problem constitutes an expressive part of it, and it is essential to guarantee a good approximation of medium properties. However, the overall impact of ABCs on the full-waveform inversion problem, from the perspective of computational cost-effectiveness and efficiency, is still widely debated in the literature (Gao et al., 2017).

This work proposes to evaluate several relevant ABCs, as applied in the context of FWI problems, while also investigating the ABCs effects on the adjoint wave equation. The analyses are carried out in a highly optimized software, namely Devito (Louboutin et al., 2019; Luporini et al., 2018), which provides a domain-specific Language (DSL) and an optimized code generation framework, for the design of finite difference kernels. In Devito, the seismic modeling examples have used Sochaki's type of Damping Boundary Layer (Sochacki et al., 1987) ~~is the default~~ method to reduce the spurious reflections. The advantage of such damping method is the ease of implementation, since it only requires one to add a single term to the acoustic wave equation, and an extension of the computational domain to accommodate for an absorbing layer. However, it can be less effective than other ABCs, sometimes requiring larger domain extensions. More popular, the so-called Perfectly Matching Layers (PML) have been widely used in FWI (Abubakar et al., 2009; Asnaashari et al., 2012; Aghamiry et al., 2019; Ben-Hadj-Ali et al., 2011). The PML require the introduction of auxiliary variables and equations into the problem, as well as extension of the computational domain. Those features make it more computationally demanding, but they are usually more effective in avoiding wave reflection at boundaries. An interesting solution to avoid the added cost of auxiliary variables, while

also preserving method effectiveness, is the use of Hybrid schemes (HABC) (Liu and Sen, 2010, 2012). In such hybrid meth-  
ods, ~~domain extensions are still required~~ pointwise absorbing boundary conditions are used together with successive domain  
60 extensions, but no additional variables, nor equations, are needed.

From the perspective of computational development, this work contributes by implementing further options of ABCs in  
Devito. Furthermore, we ~~present a new~~ propose a HABC approach based on the Higdon method (Higdon, 1986, 1987), and the  
analyses of several ABCs, as applied to adjoint equations. The analyses are carried out for two types of ABCs, namely, *Sponge*  
65 *Layers*, which use additional terms and/or equations on an extended domain absorbing layer, and *Hybrid Absorbing Boundary*  
*Conditions* (HABC), which impose absorbing pointwise boundary conditions on a set of domain extensions. In the former  
group, we highlight the Sochaki's type of Damping Boundary Layer (Sochacki et al., 1987), the Perfectly Matched Layer  
(PML) (Grote and Sim, 2010) and Convolutional Perfectly Matched Layer (CPML) (Pasalic and McGarry, 2010). Whereas for  
the latter, the ~~approach~~ combination of pointwise conditions, where here we use A1 and Higdon conditions, with successive  
70 domain extensions are used to construct, respectively, the HABC-A1 approach (Liu and Sen, 2010) and the HABC-Higdon,  
first presented in this current work, ~~are analyzed~~.

The ABC analyses are performed with heterogeneous acoustic velocity models, including realist models such as Marmousi  
(Martin et al., 2006) and a cut of 2D SEG/EAGE salt (Aminzadeh and Brac, 1997). Finally, this work has the objective of  
proposing an ABC method that combines the effectiveness in decreasing spurious boundary reflections with reduced computa-  
75 tional cost and memory usage.

Summarizing, the contributions of the current work are highlighted as follows:

- Detailed comparison of several widely used ABCs in FWI, analysing both effectiveness and computational efficiency;
- New implementations of ABCs in Devito, openly available for the scientific and industry communities;
- Theoretical and numerical study of the effects that the ABCs may have upon the adjoint problem;
- 80 - The proposition of a HABC approach based on the Higdon method for FWI, which was shown to be more effective, and  
computationally more efficient than the well-known PML method.

This work is organized as follows. Section 2 describes the mathematical framework of an FWI problem: misfit function,  
forward wave equation, adjoint wave equation and gradient of misfit function. Section 3 makes a conceptual review of the  
ABCs methods in the forward wave equation. Next, section 4 shows the algebraic development to obtain adjoint wave equation  
85 with ABCs methods. The computational framework adopted in this work is presented in section 5, including the main aspects  
of the Devito software, machine configurations and libraries tools used in the computational simulations. Results of the ABCs'  
performance in the forward and adjoint problem are presented in section 6. Section 7 presents FWI results with the employment  
of PML, HABC-Higdon and Damping methods. Finally, section 8 presents the main conclusions of the current work.

## 2 The FWI Problem

90 In essence, FWI consists in a local optimization, where the goal is to minimize the misfit between observed and predicted  
seismograms' data. On following Tarantola (1984), the misfit function can be measured by the  $L^2$  norm, which maybe written

as, in a continuous space,

$$I(m) \equiv \frac{1}{2} \int_{\tau} \int_{\Omega} (u(m, \mathbf{x}, t) - u^{obs}(m, \mathbf{x}, t))^2 \delta(\mathbf{x} - \check{\mathbf{x}}) dV dt. \quad (1)$$

The data functions,  $u = u(\mathbf{x}, t)$  and  $u^{obs} = u^{obs}(m, \mathbf{x}, t)$ , are respectively the predicted and observed data, both recorded at a finite set of receivers, located at the point positions  $\check{\mathbf{x}} \in \Omega_0$ , in a time interval  $\tau \equiv [t_0, t_f] \subset \mathbb{R}$ , where  $t_0$  is the initial time and  $t_f$  is the final time. The term  $\delta(\mathbf{x} - \check{\mathbf{x}})$  is the delta Dirac function to model the receiver point positions. The spatial domain of interest (usually two- or three-dimensional) is set as  $\Omega_0$  and referred here as physical domain.

## 2.1 Wave equation

The predicted data,  $u(m, \mathbf{x}, t)$ , is modeled here by an acoustic wave equation,

$$m(\mathbf{x})u_{tt}(\mathbf{x}, t) - \nabla^2 u(\mathbf{x}, t) = f(\mathbf{x}, t), \quad (2)$$

where  $u_{tt}$  represents the second partial derivative with respect to time  $t$  and  $\nabla^2(\cdot)$  represents the Laplacian operator with respect to  $\mathbf{x} \in \Omega_0$ . The variable coefficient  $m(\mathbf{x}) : \Omega_0 \rightarrow \mathbb{R}$  is such that  $m(\mathbf{x}) = \frac{1}{c^2(\mathbf{x})}$ , where  $c(\mathbf{x}) : \Omega_0 \rightarrow \mathbb{R}$  is the pressure wave ( $P$ -wave) velocity, which is assumed to be piecewise-constant and positive. The external force term  $f(\mathbf{x}, t) : \Omega_0 \rightarrow \mathbb{R}$ , models the source of waves and is usually described by a Ricker Wavelet (Ricker, 1940).

The acoustic wave equation should satisfy the homogeneous initial conditions, given by  $u(\mathbf{x}, 0) = 0 = u_t(\mathbf{x}, 0) = 0$ . Furthermore, for computational simulations, it is necessary to bound the domain  $\Omega_0$ . A limited area domain is illustrated in Figure 1 (a), where the limitation of type  $\Omega_0 = [x_I, x_F] \times [z_I, z_F]$  is considered. The boundaries  $\partial\Omega_i$  with  $i = 1, 2, 3$  are here referred to as truncated boundaries, and satisfy a null-Dirichlet boundary condition  $u(\mathbf{x}, t) = 0$ . Finally, the boundary  $\Omega_4$  satisfies the null-Neumann  $\nabla u(\mathbf{x}, t) \cdot \mathbf{n} = 0$  (free surface) boundary condition, where  $\mathbf{n}$  represents the outward normal (with respect to  $\partial\Omega_4$ ) unit vector.

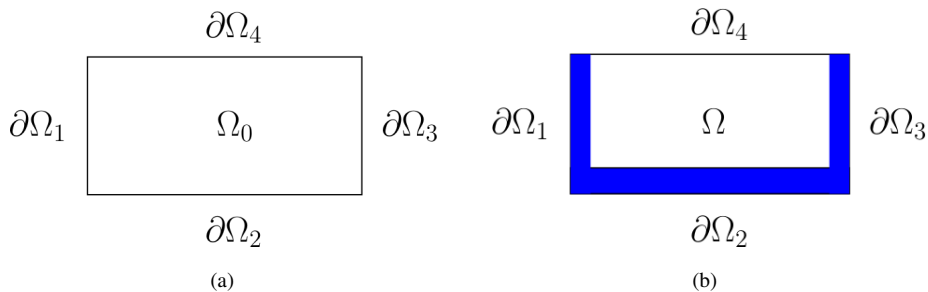

**Figure 1.** (a) Limited Domain Representation, with  $\Omega_0 = [x_I, x_F] \times [z_I, z_F]$ . (b) Extended domain representation,  $\Omega = [x_I - L_x, x_F + L_x] \times [z_I, z_F + L_z]$ , with absorption or sponge regions (of lengths  $L_x, L_z$ ) highlighted in blue.  $\partial\Omega_i, i = 1, 2, 3, 4$ , indicates the outmost boundaries of the full domain.

## 2.2 Gradient of misfit function

As mentioned in the first part of this section, in FWI the goal is to minimize the misfit function, which can be measured by eq. (1). Typically, this minimization is carried out by employing a local optimization method. Thus, it is necessary to obtain the gradient,  $\nabla_m I(m)$ , which may be computed efficiently by the adjoint method (Plessix, 2006). The adjoint-based gradient is achieved by using an augmented functional, also referred as Lagrangian functional. In the current case, it is given by,

$$\mathcal{L}(u, u^\dagger, m) = I(m) - \int_{\tau} \int_{\Omega_0} u^\dagger \cdot (mu_{tt} - \nabla^2 u - f) dV dt, \quad (3)$$

where  $u = u(\mathbf{x}, t)$ ,  $m = m(\mathbf{x})$ , and  $u^\dagger = u^\dagger(\mathbf{x}, t)$  is the Lagrange multiplier.

On a local minimum, the gradient of  $\mathcal{L}$  with respect to  $u$ ,  $u^\dagger$  and  $m$  should vanish. The gradient of  $\mathcal{L}(u, u^\dagger, m)$ , with respect to  $m$ , can be computed by

$$120 \quad \lim_{\epsilon \rightarrow 0} \frac{\mathcal{L}(u, u^\dagger, m + \epsilon m') - \mathcal{L}(u, u^\dagger, m)}{\epsilon} = \nabla_m [\mathcal{L}(u, u^\dagger, m)] m' = \nabla_m [I(m)] m' = \int_{\tau} \int_{\Omega_0} m' u \cdot u_{tt}^\dagger dV dt, \quad (4)$$

where  $m'$  is a perturbation of the parameter  $m$ .

## 2.3 Adjoint Equation

In eq. (4) we observe that the gradient  $\nabla_m I(m)$  depends on the adjoint variable  $u^\dagger$ , that is computed by solving the adjoint wave equation:

$$125 \quad mu_{tt}^\dagger - \nabla^2 u^\dagger = (u - u^{obs}) \delta(\mathbf{x} - \check{\mathbf{x}}). \quad (5)$$

For the domain  $\Omega_0$  illustrated in Figure 1 (a), the adjoint wave equation must satisfy the boundary conditions:  $u(\mathbf{x}, t) = 0$  for  $\mathbf{x} \in \partial\Omega_i$  with  $i = 1, 2, 3$ ; and  $\nabla u(\mathbf{x}, t) \cdot \mathbf{n} = 0$  for  $\mathbf{x} \in \partial\Omega_4$ . The adjoint wave equation is reverse in time. This way, the initial condition is given by  $u^\dagger(\mathbf{x}, t_f) = 0$ .

The adjoint wave equation is obtained by carrying out the gradient of  $\mathcal{L}(u, u^\dagger, m)$  with respect to the state variable  $u$ . Details as to the method to obtain it can be found in the works of Plessix (2006) and A. Fichtner (2006).

## 3 ABC's in Forward Problem

### 3.1 Domain Extension

For all the methods that we are described here, we consider an extension of the spatial domain given by  $\Omega = [x_I - L_x, x_F + L_x] \times [z_I, z_F + L_z]$ , in which an *absorption region* or *sponge layer* is added to the original spatial domain,  $\Omega_0 = [x_I, x_F] \times [z_I, z_F]$ . The *absorption region* is composed by two bands of length  $L_x$  at the beginning and end of the domain in the direction  $x$  and of a band of length  $L_z$  at the end of the domain in the  $z$  direction. Again,  $\partial\Omega$  denotes the boundary of  $\Omega$ . Figure 1b shows the extended domain  $\Omega$ , with the absorption region highlighted in blue. This kind of extension represent the typical configuration for seismic problems.

### 3.2 Damping

140 The method called *Damping* has been proposed initially by Sochaki Sochacki et al. (1987) and it is a very simple way to reduce the spurious reflections of wave propagation in limited domains. The basic idea is to extend the original domain, by adding a sponge layer to it, like the one in Figure 1b, and then to introduce a damping term into the original wave equation (2), such that it only affects the added layer. The resulting damped acoustic equation is given by,

$$m(\mathbf{x})u_{tt}(\mathbf{x}, t) + \zeta(\mathbf{x})u_t(\mathbf{x}, t) - \nabla^2 u(\mathbf{x}, t) = f(\mathbf{x}, t), \quad (6)$$

145 where the acoustic wave equation (2) has been modified by the introduction of the damping term  $\zeta(\mathbf{x})u_t(\mathbf{x}, t)$ , with  $\zeta(\mathbf{x})$  being nonzero only within the absorption region. That is, it should grow smoothly across the absorption bands from zero to its maximum at the outermost boundary. One may still impose the same initial and boundary conditions defined in the previous section.

Sochacki et al. (1987) proposed various alternatives for the damping function,  $\zeta(\mathbf{x})$ , including linear, cubic or exponential forms. In general, all of them share a similar characteristic: they vanish identically throughout the interior domain  $\Omega_0$ , while growing within the added bands from zero toward the outer boundary  $\partial\Omega$ . We define the pair of functions  $\zeta_1(\mathbf{x})$  and  $\zeta_2(\mathbf{x})$  as, respectively:

$$\hat{\zeta}_1(\mathbf{x}) = \begin{cases} 0, & \text{if } x \in (x_I, x_F), \\ \bar{\zeta}_1(\mathbf{x}) \left( \frac{|x - x_I|}{L_x} - \frac{1}{2\pi} \sin \left( \frac{2\pi|x - x_I|}{L_x} \right) \right), & \text{if } x_I - L_x \leq x \leq x_I, \\ \bar{\zeta}_1(\mathbf{x}) \left( \frac{|x - x_F|}{L_x} - \frac{1}{2\pi} \sin \left( \frac{2\pi|x - x_F|}{L_x} \right) \right), & \text{if } x_F \leq x \leq x_F + L_x, \end{cases} \quad (7)$$

$$155 \quad \hat{\zeta}_2(\mathbf{x}) = \begin{cases} 0, & \text{if } z \in (z_I, z_F), \\ \bar{\zeta}_2(\mathbf{x}) \left( \frac{|z - z_F|}{L_z} - \frac{1}{2\pi} \sin \left( \frac{2\pi|z - z_F|}{L_z} \right) \right), & \text{if } z_F \leq z \leq z_F + L_z, \end{cases} \quad (8)$$

so that the actual damping function  $\zeta(\mathbf{x})$  is given by:

$$\zeta(\mathbf{x}) = \frac{1}{c_{max}} \left( \frac{\hat{\zeta}_1(\mathbf{x})}{\Delta x} + \frac{\hat{\zeta}_2(\mathbf{x})}{\Delta z} \right), \quad (9)$$

where  $c_{max}$  denotes the maximum velocity of propagation of  $c(\mathbf{x})$ ,  $\Delta x$  and  $\Delta z$  are the discrete cell sizes of the spatial domain, respectively in the  $x$  and  $z$  directions.

The method called *Perfectly Matched Layer* (PML) has several formulations in the literature, considering the acoustic (second order equation or first order system formulations) and elastic cases. Like the Damping method, the PML is widely used in seismic problems, particularly due to its efficacy in reducing spurious reflections in limited domains, being more effective than the Damping method. The formulation we present here has been proposed by Grote and Sim (2010) for the second order form  
 165 of wave equation in second order equation.

The reasoning is similar to the Damping method, in that sponge layers extend the original domain, like those in Figure 1b. Additional terms are also introduced into the original wave equation (2), which only affect the sponge layers, but now there are two of them, and they have their own evolution equations.

The two auxiliary functions provide adequate damping of wave reflections by using similar terms to those of the Damping  
 170 method. The design of the method is such that it would ideally suppress all reflections in a continuous setting. However, some reflections may remain for a finite difference discretization, although strongly attenuated.

The full set of equations for the acoustic wave propagation with PML, along with the auxiliary functions, is given by:

$$m(\mathbf{x})u_{tt}(\mathbf{x}, t) + (\zeta_1(\mathbf{x}) + \zeta_2(\mathbf{x}))u_t(\mathbf{x}, t) + \zeta_1(\mathbf{x})\zeta_2(\mathbf{x})u(\mathbf{x}, t) = \nabla^2 u(\mathbf{x}, t) + \phi_{1,x}(\mathbf{x}, t) + \phi_{2,z}(\mathbf{x}, t) + f(\mathbf{x}, t), \quad (10)$$

$$175 \quad \phi_{1,t}(\mathbf{x}, t) = -\zeta_1(\mathbf{x})\phi_1(\mathbf{x}, t) + c^2(\mathbf{x})(\zeta_2(\mathbf{x}) - \zeta_1(\mathbf{x}))u_x(\mathbf{x}, t), \quad (11)$$

$$\phi_{2,t}(\mathbf{x}, t) = -\zeta_2(\mathbf{x})\phi_2(\mathbf{x}, t) + c^2(\mathbf{x})(\zeta_1(\mathbf{x}) - \zeta_2(\mathbf{x}))u_z(\mathbf{x}, t). \quad (12)$$

Here,  $\phi_1(\mathbf{x})$  and  $\phi_2(\mathbf{x})$  represent the auxiliary variables, which are nonzero only in the absorption region. The notation  $\phi_{i,t}$  indicates partial derivative of  $\phi_i$ ,  $i = 1, 2$ , with respect to the variable  $t$ , and similarly for the variables  $x$  and  $z$ , respectively, with  $\phi_{i,x}$  and  $\phi_{i,z}$ . The damping functions  $\zeta_1(\mathbf{x})$  and  $\zeta_2(\mathbf{x})$  are defined as in the Damping method. The auxiliary functions will  
 180 also be kept at zero over all the outer boundary of  $\Omega$ .

On discretizing the PML equations, we ~~stagger~~<sup>1</sup> spatial position different variables on different places of the grid, dislocating by half grid-size, or half temporal-step, in a so-called staggering of variables, as done in Grote and Sim (2010). Spatial variables for the auxiliary functions  $\phi_1$  are staggered in the  $x$  direction, and ~~stagger~~ $\phi_2$  staggered in the  $z$  direction, as in Grote and Sim (2010) shown in Figure 2. This staggering is convenient, considering the centered discretization adopted here  
 185 for the partial derivatives of those functions. As a result of this,  $u$  must be staggered in the directions of the partial derivatives in the evolution equations of  $\phi_1$  and  $\phi_2$ . Conversely,  $\phi_1$  and  $\phi_2$  should be staggered in the directions of the partial derivatives in the evolution equation of  $u$ .

Moreover, some variables are also staggered in time, thus being defined at intermediary time instants. As a final result, the variable  $u(\mathbf{x}, t)$  is taken as *non-staggered* (co-located) in space, whereas  $\phi_1(\mathbf{x}, t)$  and  $\phi_2(\mathbf{x}, t)$  are *staggered*, the func-  
 190 tions  $\zeta_1(\mathbf{x})$ ,  $\zeta_2(\mathbf{x})$ ,  $c(\mathbf{x})$  and  $f(\mathbf{x}, t)$  are *staggered* in equation (10) and *non-staggered* in the equations (11) and (12), when

<sup>1</sup> ~~Staggering here means we allow the placement of variables to be dislocated by half grid-size, or half temporal-step, in such a way that different variables maybe placed in slightly different grid positions or time instants.~~

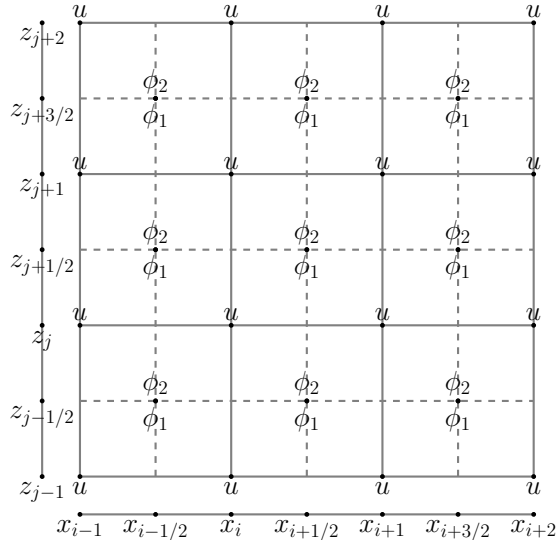

**Figure 2.** Staggering of variables for PML discretization.

they appear in those equations. Therefore, when updating  $u(\mathbf{x}, t)$ , we employ averages of neighboring values of  $\phi_1(\mathbf{x}, t)$  and  $\phi_2(\mathbf{x}, t)$ , so that we have them on the non-staggered grid. On the other hand, when updating  $\phi_1(\mathbf{x}, t)$  and  $\phi_2(\mathbf{x}, t)$  we average the neighboring values of  $u(\mathbf{x}, t)$ , to define it on the staggered grid.

### 3.4 Convolutional Perfectly Matched Layer

195 Although the PML method is usually very efficient for reducing boundary reflections, there are situations, such as in the presence of grazing waves, in which it is less effective. The *Convolutional Perfectly Matched Layer* (CPML) has been proposed as an improvement over PML, which should reduce late time low-frequency wave reflections and provide better absorption of grazing waves. In the case of the acoustic wave equation, the CPML is generally derived for the first order set of PDEs, but here we adopt the formulation proposed by Pasalic and McGarry (2010), which was designed for the second order form of the  
200 wave equation.

The rationale is similar to the PML, in that one extends the original domain, by adding a sponge layer to it (Fig. 1b). However, now one introduces four auxiliary functions into the original wave equation (2). These functions also have their own evolution equations, and can only affect the absorbing layer, just as in the previous approach.

The four auxiliary functions should provide adequate damping of wave reflections, by using similar terms to those of the  
205 PML. They consist of weighed-combinations of the displacement and the auxiliary functions, themselves. By design, the method should ideally suppress all reflections in a continuous setting, including those situations where the PML method fails.

The main equation reads

$$m(\mathbf{x})u_{tt}(\mathbf{x}, t) = \nabla^2 u(\mathbf{x}, t) + \psi_{1,x}(\mathbf{x}, t) + \psi_{2,z}(\mathbf{x}, t) + \phi_1(\mathbf{x}, t) + \phi_2(\mathbf{x}, t) + f(\mathbf{x}, t), \quad (13)$$



and the auxiliary functions are updated by discrete in time relations (from time  $t_n$  advancing a time-step size of  $\Delta t$  leading to  
210  $t_{n+1}$ ):

$$\psi_1(\mathbf{x}, t_{n+1}) = a_1(\mathbf{x})\psi_1(\mathbf{x}, t_n) + b_1(x, z)u_x(\mathbf{x}, t_{n+1}), \quad (14)$$

$$\psi_2(\mathbf{x}, t_{n+1}) = a_2(\mathbf{x})\psi_2(\mathbf{x}, t_n) + b_2(\mathbf{x})u_z(\mathbf{x}, t_{n+1}), \quad (15)$$

$$\phi_1(\mathbf{x}, t_{n+1}) = a_1(\mathbf{x})\phi_1(\mathbf{x}, t_n) + b_1(\mathbf{x})[u_{xx}(\mathbf{x}, t_{n+1}) + \psi_{1,x}(\mathbf{x}, t_{n+1})], \quad (16)$$

$$\phi_2(\mathbf{x}, t_{n+1}) = a_2(\mathbf{x})\phi_2(\mathbf{x}, t_n) + b_2(\mathbf{x})[u_{zz}(\mathbf{x}, t_{n+1}) + \psi_{2,z}(\mathbf{x}, t_{n+1})], \quad (17)$$

215 where we have again used the notation for partial derivatives with double sub-index, as in  $\psi_{2,z}$  meaning that the second component of  $\psi$  is differentiated with respect to the  $z$  variable. The weighting factors for the auxiliary functions are given by

$$a_1(\mathbf{x}) = e^{-[\zeta_1(\mathbf{x}) + \alpha_1]\Delta t}, \quad b_1(\mathbf{x}) = \frac{\zeta_1(\mathbf{x})[a_1(\mathbf{x}) - 1]}{[\zeta_1(\mathbf{x}) + \alpha_1]}, \quad (18)$$

$$a_2(\mathbf{x}) = e^{-[\zeta_2(\mathbf{x}) + \alpha_2]\Delta t}, \quad b_2(\mathbf{x}) = \frac{\zeta_2(\mathbf{x})[a_2(\mathbf{x}) - 1]}{[\zeta_2(\mathbf{x}) + \alpha_2]}. \quad (19)$$

220 The four auxiliary functions are only nonzero within the absorption region, while the functions  $\zeta_1(\mathbf{x})$  and  $\zeta_2(\mathbf{x})$  are defined as in the Damping method. The constants  $\alpha_1, \alpha_2 \in \mathbb{R}$  can be chosen according to the problem.

### 3.5 Hybrid Absorbing Boundary Condition

The last class of ABCs to be discussed here is termed *Hybrid Absorbing Boundary Condition* (HABC). They can be interpreted as a combination of ~~Sponge-Layer and ABC~~ pointwise absorbing boundary conditions (ABC) and domain extensions (like  
225 Sponge Layers), justifying the terminology of a Hybrid method.

It is possible to use ABCs that do not require domain extension, enforced as pointwise boundary conditions, as suggested by the A1 Clayton's condition (Clayton and Engquist, 1977), and the schemes by Higdon (1986, 1987). While these demand very little in terms of computational cost, they can still be prone to spurious reflections, if used on their own. However, they can be effective if used in a hybrid way, in combination with ~~sponge-layers~~ domain extensions, as we illustrate below.

230 Clayton's A1 boundary condition Clayton and Engquist (1977) is based on a One-Way Wave Equation (OWWE). This simple condition is such that outgoing waves normal to the border would leave without reflection. At the  $\partial\Omega_1$  part of the boundary, the condition is,

$$u_t(x, z, t) - c(x, z)u_x(x, z, t) = 0, \quad (x, z) \in \partial\Omega_1, \quad (20)$$

while at  $\partial\Omega_3$  the condition is

$$235 \quad u_t(x, z, t) + c(x, z)u_x(x, z, t) = 0, \quad (x, z) \in \partial\Omega_3, \quad (21)$$

and at  $\partial\Omega_2$  the condition is

$$u_t(x, z, t) - c(x, z)u_z(x, z, t) = 0, \quad (x, z) \in \partial\Omega_2, \quad (22)$$

where we have explicitly expanded the spatial domain variable in its components ( $\mathbf{x} = (x, z)$ ).

The Higdon Boundary condition (Higdon, 1986, 1987), can take into account additional incidence directions, not only the normal direction as in Clayton's A1 condition. The scheme, termed to be of order  $p \in \mathbb{N}$ , is given at  $\partial\Omega_1$  and  $\partial\Omega_3$  by:

$$\prod_{j=1}^p \left[ \cos(\alpha_j) \left( \frac{\partial}{\partial t} - c(\mathbf{x}) \frac{\partial}{\partial x} \right) u(\mathbf{x}, t) \right] = 0, \quad (23)$$

and at  $\partial\Omega_2$

$$\prod_{j=1}^p \left[ \cos(\alpha_j) \left( \frac{\partial}{\partial t} - c(\mathbf{x}) \frac{\partial}{\partial z} \right) u(\mathbf{x}, t) \right] = 0. \quad (24)$$

This method ensure that outgoing waves with angle of incidence at the boundary equal to  $\alpha_j$  present no reflection. The method we use in this work employs order 2 ( $p = 2$ ) and angles 0 and  $\pi/4$ .

To combine these schemes with sponge layers, thus leading to hybrid schemes (HABC), we also extend the spatial domain as in Figure 1b. The difference with respect to previous schemes is that this extended region will now be considered as the union of several nested gradual extensions. As represented in Figure 3, we define a region  $A_M = \Omega_0$ , and the regions  $A_k, k = M - 1, \dots, 1$  will be defined as the previous region  $A_{k+1}$  to which we add one extra grid line to the left, right and bottom sides of it, such that the final region  $A_1 = \Omega$ .

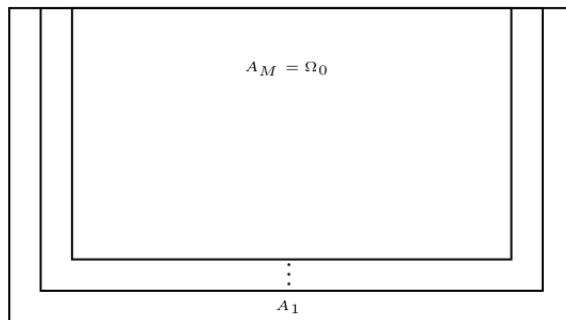

**Figure 3.** Nesting of domains for the Hybrid ABC method. The full region  $A_1$  is equivalent to  $\Omega$ .

To illustrate how the HABC is used, we will describe the process of how we obtain a solution using the usual solution of Acoustic Wave Equation together with the absorbing conditions showed in A1 and Higdon schemes. First, assume  $u(\mathbf{x}, t - \Delta t)$  is known at instant  $t - \Delta t$  in all the extended  $\Omega$  domain. We then update one time step from the solution  $u(\mathbf{x}, t - \Delta t)$  to  $u(\mathbf{x}, t)$  using the usual Acoustic Wave Equation over  $\Omega$ , with the null Dirichlet or Neumann boundary conditions defined for  $\partial\Omega$ .

Now, for each region  $A_k$ , with  $k$  going from the innermost domain  $A_M$  to the outermost domain  $A_1$ , we construct an auxiliary functions,  $u_k(\mathbf{x}, t)$ , based on the current solution,  $u(\mathbf{x}, t)$ , by applying the absorbing condition A1 or Higdon for the domain ( $A_k$ ). For finite difference schemes, this implies in altering only the values of  $u(\mathbf{x}, t)$  at the border of  $A_k$ , that is, on  $\partial A_k$ , to obtain  $u_k(\mathbf{x}, t)$ . The final solution for each region  $A_k$ , which will be the input solution for region  $A_{k-1}$ , will be given

by a convex combination between  $u_k(\mathbf{x}, t)$  and  $u(\mathbf{x}, t)$ , as

$$260 \quad \tilde{u}(\mathbf{x}, t) = (1 - \omega_k)u(\mathbf{x}, t) + \omega_k u_k(\mathbf{x}, t), \quad (25)$$

where  $w_k$  is a weight function that grows from zero at  $A_M = \partial\Omega_0$  to one at  $A_1 = \partial\Omega$ , and  $\tilde{u}(\mathbf{x}, t)$  will be used as the new  $u(\mathbf{x}, t)$  for the next region ( $A_{k-1}$ ). Summarizing, we loop over the nested regions, from innermost to outermost, subsequently applying the pointwise A1 or Higdon boundary conditions, weighting with respect to the a distance metric of each boarder from the innermost domain (defined by weights  $w_k$ ).

265 The particular weight function to be used could vary linearly or non-linearly (Liu and Sen, 2018). We can choose a *linear* weight function as

$$\omega_k = \frac{M - k}{M}; \quad (26)$$

or, preferably, a *non linear* function,

$$\omega_k = \begin{cases} 1, & \text{if } 1 \leq k \leq P + 1, \\ \left(\frac{M - k}{M - P}\right)^\alpha, & \text{if } P + 2 \leq k \leq M - 1. \\ 0, & \text{if } k = M. \end{cases} \quad (27)$$

270 We take  $P = 2$  and we choose  $\alpha$  following Liu and Sen (2018):

- $\alpha = 1.5 + 0.07(\text{npt} - P)$ , in the case of A1;
- $\alpha = 1.0 + 0.15(\text{npt} - P)$ , in the case of Higdon.

where the value of  $\text{npt}$  designates the number of discrete points that define the length of the extended region in the direction  $x$  or  $z$ . In our experiments, we observed that HABC produces better results with a non-linear weight function, but the choice of the  
275 type of weights can be adapted according to the application. Moreover, [here we use the values for  \$\alpha\$  follow Liu and Sen \(2018\) and these values are for our applications proposed by Liu and Sen \(2018\)](#), but the parameter can be adjusted for specific cases.

#### 4 ABCs in Adjoint Problem

After introducing the different approaches of ABCs, ~~the goal now is to obtain this section presents~~ the adjoint equations ~~for each of them. To do so, the augmented functional is considered, in which the constraints are given by the wave equation and~~  
280 ~~by the equations used in ABCs.~~

~~As shown before, to apply any of the ABCs of interest of this study, the domain considered is built as the union of the physical domain  $\Omega_0$  and the extended domain  $\Omega_e = \Omega/\Omega_0$ . In FWI, the goal is to minimize the objective functional  $I(m)$  on the physical domain  $\Omega_0$ . Therefore, the objective functional remains being defined by the expression (1), but now defined over  $\Omega_0$ . The formulations and further details for all ABC methods here investigated are presented in Appendix A.~~

285 **4.1 Damping**

The acoustic wave equation with dampening mechanism is given by (6). The corresponding adjoint equations are obtained on pursuing the same sequence presented by Plessix (2006). So, the first step is to write the augmented functional considering the equations defined in the physical and in the extended domains:-

$$\mathcal{L}(u, m, u^\dagger) = I(m) - \int_{\tau} \int_{\Omega} u^\dagger \cdot (mu_{tt} - \nabla^2 u - \zeta u_t - f) dV dt,$$

290 where  $u = u(\mathbf{x}, t)$  and  $\zeta = \zeta(\mathbf{x})$ .

In the current case, the The adjoint wave equation with dampening mechanism is defined in the domain  $\Omega$  illustrated by the blue region in Fig. 1(b). To obtain the adjoint equation, their initial and boundary conditions, the gradient  $\frac{\partial}{\partial u} [\mathcal{L}(u, u^\dagger, m)] u'$  is written as follows:-

$$\lim_{\epsilon \rightarrow 0} \frac{\mathcal{L}(u + \epsilon u', u^\dagger, m) - \mathcal{L}(u, u^\dagger, m)}{\epsilon} = \nabla_u [\mathcal{L}(u, u^\dagger, m)] u' = \nabla_u [I(m)] u' - \int_{\tau} \int_{\Omega} u^\dagger \cdot (mu'_{tt} - \nabla^2 u' + \zeta u'_t) dV dt,$$

295 where  $u'$  is a perturbation of the variable  $u$ .

Integration by parts is applied as shown below:-

$$\nabla_u [\mathcal{L}(u, u^\dagger, m)] u' = \nabla_u [I(m)] u' - \int_{\tau} \int_{\Omega} (mu'_{tt} - \nabla^2 u' - \zeta u'_t) \cdot u' dV dt + \mathcal{B},$$

where the gradient  $\nabla_u [I(m)] u'$  damping ABC method is given by:

$$\nabla_u [I(m)] u' = \int_{\tau} \int_{\Omega} (u - u^o) u' \delta(\mathbf{x} - \tilde{\mathbf{x}}) dV dt.$$

300 The term  $\mathcal{B}$  is the bilinear concomitant, which the integration by parts entails. After applying the Divergence Theorem,  $\mathcal{B}$  reads:

$$\mathcal{B} = \mathcal{B}(u', u^\dagger, m) = \int_{\tau} \int_{\partial(\Omega)} (-u^\dagger \nabla u' + \nabla u^\dagger u') \cdot \mathbf{n} dS dt + \int_{\Omega} \underbrace{m u u_{tt}^\dagger}_{\text{damping}} \cdot \underbrace{u'_t}_{\text{ABC}} - \underbrace{\nabla^2 u^\dagger}_t u' - \zeta u^\dagger_t = \underbrace{(u' - u^o)}_{\text{ABC}} \delta(\mathbf{x} - \tilde{\mathbf{x}}) \underbrace{dV}_{\text{ABC}} \underbrace{dt}_{\text{ABC}} \cdot \forall \mathbf{x} \in \Omega,$$

The adjoint meaning a self-adjoint wave equation, their initial and boundary conditions, are then defined by imposing  $\nabla_u [\mathcal{L}(u, u^\dagger, m)] u' = 0$ . That means defining the adjoint equation as follows:-

305  $mu'_{tt} - \nabla^2 u' + \zeta u'_t = (u - u^o) \delta(\mathbf{x} - \tilde{\mathbf{x}}) \forall \mathbf{x} \in \Omega$ .

Also, on considering the which satisfies the following boundary and initial conditions of the forward wave equation, and by imposing the adjoint boundary conditions given by:-

$$u^\dagger = 0, \quad \forall \mathbf{x} \in \partial\Omega_i, \quad i = 1, 2, 3, \quad (28)$$

$$\frac{\partial u^\dagger}{\partial z} = 0, \quad \forall \mathbf{x} \in \partial\Omega_4, \quad (29)$$

$$310 \quad \underline{u^\dagger(\mathbf{x}, t_f) = u_t^\dagger(\mathbf{x}, t_f) = 0 \forall \mathbf{x} \in \Omega.} \quad (30)$$

The bilinear concomitant is reduced to:-

$$\underline{\mathcal{B} = \mathcal{B}(u', u^\dagger, m) = \int_{\Omega} \left[ m \left( u^\dagger \cdot u'_t - u_t^\dagger u' \right) - \zeta u^\dagger u' \right] d\mathcal{V} \Big|_{t_0}^{t_f} .}$$

The homogeneous initial conditions of the forward wave equation drive the domain integral to zero, that is evaluated at  $t_0 = 0$ . In order to eliminate the corresponding domain integral for  $t = t_f$ , one could impose the following homogeneous

315 final conditions on the adjoint variable:  $u^\dagger$ :

$$\underline{u^\dagger(\mathbf{x}, t_f) = u_t^\dagger(\mathbf{x}, t_f) = 0}$$

To make the algebra simpler with respect to these conditions, one could define an adjoint time variable in the form-

$$\underline{t^\dagger \equiv t_f - t \quad \Rightarrow \quad dt^\dagger = -dt \quad \Rightarrow}$$

$$\underline{\Rightarrow \begin{cases} t = 0 \Leftrightarrow t^\dagger = t_f \\ t = t_f \Leftrightarrow t^\dagger = 0 \end{cases} \quad \Rightarrow \quad u^\dagger(\mathbf{x}, t_f) = u_t^\dagger(\mathbf{x}, t_f) = 0 .}$$

320 As a result of this change of variables, the adjoint wave equation (A2) becomes, in its final form:-

$$\underline{m u_{tt}^\dagger - \nabla^2 u^\dagger - \zeta u_t^\dagger = (u - u^o) \delta(\mathbf{x} - \tilde{\mathbf{x}}) \forall \mathbf{x} \in \Omega,}$$

which means it is a self-adjoint wave equation. index  $i = 1, 2, 3, 4$  are based in the boundaries illustrated in Figure 1(b).

## 4.2 PML and CPML

325 The work of Xie et al. (2014) presents a mathematical development to obtain the adjoint wave system with the refereed complex frequency-shifted unsplit field perfectly matched layer (CFS-UPML). In essence, the Fourier transform  $\hat{u} = \int_{-\infty}^{\infty} e^{st} u(\mathbf{x}, t) dt$  of the displacement vector,  $u$ , satisfies the Helmholtz equation:-

$$\underline{s^2 \hat{u} = \nabla(c^2 \nabla \hat{u})}$$

where  $s \in \mathcal{C}$ . Also, one considers the transform of spatial coordinates  $\mathbf{x}$ :-

$$\underline{\tilde{\mathbf{x}} := \int_{\Omega} \gamma(\mathbf{x}) d\mathcal{V} .}$$

330 where, for the 2-D case,  $\gamma(\mathbf{x}) = [\gamma_1, \gamma_2]^T = [\gamma_1(\mathbf{x}), \gamma_2(\mathbf{x})]^T$  is the complex stretching function,-

$$\gamma_j = \kappa_j + \frac{\zeta_j}{\alpha_j + is}, \quad j = 1, 2 \quad \text{for 2-D case}$$

and  $i = \sqrt{-1}$ .

The next step consists in reformulating eq. (A7) in time domain. In the 2-D case, it leads to:-

$$335 \quad \underline{mL(t) * u = \frac{\partial}{\partial x} \left( \mathcal{F}^{-1} \left( \frac{\gamma_2}{\gamma_1} \right) * u_x \right) + \frac{\partial}{\partial z} \left( \mathcal{F}^{-1} \left( \frac{\gamma_1}{\gamma_2} \right) * u_z \right) + f,}$$

where  $L(t) = \mathcal{F}^{-1}(s^2 \gamma_1 \gamma_2)$ ,  $\mathcal{F}^{-1}$  is the inverse Fourier transform, and  $*$  represents a convolution.-

On taking the wave equation (A8) into account, the adjoint system is then defined as (Xie et al., 2014):-

$$\underline{mL(t) * u^\dagger = \frac{\partial}{\partial x} \left( \mathcal{F}^{-1} \left( \frac{\gamma_2}{\gamma_1} \right) * u_x^\dagger \right) + \frac{\partial}{\partial z} \left( \mathcal{F}^{-1} \left( \frac{\gamma_1}{\gamma_2} \right) * u_z^\dagger \right) + (u - u^o) \delta(\mathbf{x} - \check{\mathbf{x}}),}$$

340 which satisfies the conditions (A3), (A4) and (A5)-

In the standard PML formulation,  $\alpha_j = 0$ ,  $\kappa_j = 1$  (Berenger et al., 1994). Therefore, the adjoint wave equation with PML is a particular case of the methodology presented by Xie et al. (2014). Hence, for the 2-D case the convolutions of the adjoint wave equation (A9) are given by:-

$$\underline{L(t) * u^\dagger = u_{tt}^\dagger + (\zeta_1 + \zeta_2) u_t^\dagger + \zeta_1 \zeta_2 u^\dagger,}$$

$$345 \quad \underline{\mathcal{F}^{-1} \left( \frac{\gamma_2}{\gamma_1} \right) * u_x^\dagger = u_x^\dagger - (\zeta_1 - \zeta_2) [\exp^{-\zeta_1 t} H(t)] * u_x^\dagger,}$$

$$\underline{\mathcal{F}^{-1} \left( \frac{\gamma_1}{\gamma_2} \right) * u_z^\dagger = u_z^\dagger - (\zeta_2 - \zeta_1) [\exp^{-\zeta_2 t} H(t)] * u_z^\dagger,}$$

where  $H(t)$  is the Heaviside distributions.-

The convolution terms  $(\zeta_1 - \zeta_2) [\exp^{-\zeta_1 t} H(t)] * u_x^\dagger$  and  $(\zeta_2 - \zeta_1) [\exp^{-\zeta_2 t} H(t)] * u_z^\dagger$  may be solved by considering auxiliary differential equations (Grote and Sim, 2010; Xie et al., 2014). On defining the auxiliary functions as-

$$350 \quad \underline{\phi_1^\dagger = (\zeta_1 - \zeta_2) [\exp^{-\zeta_1 t} H(t)] * u_x^\dagger,}$$

$$\underline{\phi_2^\dagger = (\zeta_2 - \zeta_1) [\exp^{-\zeta_2 t} H(t)] * u_z^\dagger,}$$

the terms (A11) and (A12) are rewritten as:-

$$\underline{\mathcal{F}^{-1} \left( \frac{\gamma_2}{\gamma_1} \right) * u_x^\dagger = u_x^\dagger - \phi_1^\dagger, \quad \mathcal{F}^{-1} \left( \frac{\gamma_1}{\gamma_2} \right) * u_z^\dagger = u_z^\dagger - \phi_2^\dagger.}$$

~~Therefore, the~~ The adjoint wave equation ~~(A9)~~ with the employment of PML method reads:

$$355 \quad \underline{mu_{tt}^\dagger + (\zeta_1 + \zeta_2)u_t^\dagger + \zeta_1\zeta_2u^\dagger = \nabla^2u^\dagger + (\phi_1^\dagger)_x + (\phi_2^\dagger)_z + (u - u^o)\delta(\mathbf{x} - \check{\mathbf{x}}),}$$

$$\underline{mu_{tt}^\dagger + (\zeta_1 + \zeta_2)u_t^\dagger + \zeta_1\zeta_2u^\dagger = \nabla^2u^\dagger + (\phi_1^\dagger)_x + (\phi_2^\dagger)_z + (u - u^o)\delta(\mathbf{x} - \check{\mathbf{x}}),}$$

where the auxiliary functions  $\phi_1^\dagger$  and  $\phi_2^\dagger$  satisfy the respective auxiliary differential equations:

$$\underline{(\phi_1^\dagger)_t = -\zeta_1\phi_1^\dagger + (\zeta_2 - \zeta_1)u_x^\dagger,}$$

$$360 \quad \underline{(\phi_2^\dagger)_t = -\zeta_2\phi_2^\dagger + (\zeta_1 - \zeta_2)u_z^\dagger,}$$

$$\underline{(\phi_1^\dagger)_t = -\zeta_1\phi_1^\dagger + (\zeta_2 - \zeta_1)u_x^\dagger,}$$

$$\underline{(\phi_2^\dagger)_t = -\zeta_2\phi_2^\dagger + (\zeta_1 - \zeta_2)u_z^\dagger.}$$

~~The adjoint wave equation (A9) may be also written according to the formulation presented in Pasalic and McGarry (2010)~~  
 365 ~~, i.e., CPML formulation. In this case,  $\alpha_j$  is a positive value, and  $\kappa_j = 1$  (Pasalic and McGarry, 2010). Therefore, to write an~~  
~~adjoint system with~~ For the CPML method, ~~eq. (A9) is rewritten as:-~~

$$\underline{m\mathcal{F}^{-1}(s^2) * u^\dagger = \mathcal{F}^{-1}\left(\frac{1}{\gamma_1}\right) * \frac{\partial}{\partial x}\left(\mathcal{F}^{-1}\left(\frac{1}{\gamma_1}\right) * u_x^\dagger\right) +}$$

$$\underline{+\mathcal{F}^{-1}\left(\frac{1}{\gamma_2}\right) * \frac{\partial}{\partial z}\left(\mathcal{F}^{-1}\left(\frac{1}{\gamma_2}\right) * u_z^\dagger\right) + (u - u^o)\delta(\mathbf{x} - \check{\mathbf{x}}),}$$

where  $\mathcal{F}^{-1}(s^2) * u^\dagger = u_{tt}$  and, on following Pasalic and McGarry (2010), we have:-

$$370 \quad \underline{\mathcal{F}^{-1}\left(\frac{1}{\gamma_1}\right) * \frac{\partial}{\partial x}\left(\mathcal{F}^{-1}\left(\frac{1}{\gamma_1}\right) * u_x^\dagger\right) = u_{xx}^\dagger + (\phi_1^\dagger)_x + (\psi_1^\dagger)_x}$$

$$\underline{\mathcal{F}^{-1}\left(\frac{1}{\gamma_1}\right) * \frac{\partial}{\partial z}\left(\mathcal{F}^{-1}\left(\frac{1}{\gamma_1}\right) * u_z^\dagger\right) = u_{zz}^\dagger + (\phi_2^\dagger)_z + (\psi_2^\dagger)_z.}$$

~~Therefore,~~ the adjoint wave equation ~~(A16)~~ is cast in the form:

$$\underline{mu_{tt}^\dagger = \nabla^2u^\dagger + (\psi_1^\dagger)_x + (\psi_2^\dagger)_z + \phi_1^\dagger + \phi_2^\dagger + (u - u^o)\delta(\mathbf{x} - \check{\mathbf{x}}),}$$

$$375 \quad \underline{mu_{tt}^\dagger = \nabla^2u^\dagger + (\psi_1^\dagger)_x + (\psi_2^\dagger)_z + \phi_1^\dagger + \phi_2^\dagger + (u - u^o)\delta(\mathbf{x} - \check{\mathbf{x}}),}$$

where the auxiliary functions  $(\psi_1^\dagger, \psi_2^\dagger, \phi_1^\dagger, \phi_2^\dagger)$  are ~~obtained by using the auxiliary equations~~ given by:

$$\underline{\psi_1^\dagger(\mathbf{x}, t_{n-1}) = a_1(\mathbf{x})\psi_1^\dagger(\mathbf{x}, t_n) + b_1(x, z)u_x^\dagger(\mathbf{x}, t_{n-1})},$$

$$\underline{\psi_2^\dagger(\mathbf{x}, t_{n-1}) = a_2(\mathbf{x})\psi_2^\dagger(\mathbf{x}, t_n) + b_2(\mathbf{x})u_z^\dagger(\mathbf{x}, t_{n-1})},$$

$$380 \quad \underline{\phi_1^\dagger(\mathbf{x}, t_{n-1}) = a_1(\mathbf{x})\phi_1^\dagger(\mathbf{x}, t_n) + b_1(\mathbf{x}) \left[ u_{xx}^\dagger(\mathbf{x}, t_{n-1}) + \psi_{1,x}^\dagger(\mathbf{x}, t_{n-1}) \right]},$$

$$\underline{\phi_2^\dagger(\mathbf{x}, t_{n-1}) = a_2(\mathbf{x})\phi_2^\dagger(\mathbf{x}, t_n) + b_2(\mathbf{x}) \left[ u_{zz}^\dagger(\mathbf{x}, t_{n-1}) + \psi_{2,z}^\dagger(\mathbf{x}, t_{n-1}) \right]}.$$

$$\underline{\psi_1^\dagger(\mathbf{x}, t_{n-1}) = a_1(\mathbf{x})\psi_1^\dagger(\mathbf{x}, t_n) + b_1(x, z)u_x^\dagger(\mathbf{x}, t_{n-1})},$$

$$\underline{\psi_2^\dagger(\mathbf{x}, t_{n-1}) = a_2(\mathbf{x})\psi_2^\dagger(\mathbf{x}, t_n) + b_2(\mathbf{x})u_z^\dagger(\mathbf{x}, t_{n-1})},$$

$$385 \quad \underline{\phi_1^\dagger(\mathbf{x}, t_{n-1}) = a_1(\mathbf{x})\phi_1^\dagger(\mathbf{x}, t_n) + b_1(\mathbf{x}) \left[ u_{xx}^\dagger(\mathbf{x}, t_{n-1}) + \psi_{1,x}^\dagger(\mathbf{x}, t_{n-1}) \right]},$$

$$\underline{\phi_2^\dagger(\mathbf{x}, t_{n-1}) = a_2(\mathbf{x})\phi_2^\dagger(\mathbf{x}, t_n) + b_2(\mathbf{x}) \left[ u_{zz}^\dagger(\mathbf{x}, t_{n-1}) + \psi_{2,z}^\dagger(\mathbf{x}, t_{n-1}) \right]}.$$

The adjoint auxiliary equations ~~(A18)–(A21)~~  $\psi_i^\dagger$  and  $\phi_i^\dagger$  ( $i=1, 2$ ) are solved recursively in adjoint/backward time  $t^\dagger$ , which is reverse with respect to the forward time  $t$ .

Again, it is possible to note that the resulting adjoint equations are self-adjoint with respect to the forward problem with  
390 PML ~~–~~

and CPML. Both PML and CPML adjoint wave equations satisfy the boundary and initial conditions given by the eqs. (28)–(30).

### 4.3 Hybrid Absorbing Boundary Condition (HABC)

~~The HABC methods apply the discrete convex combination (25) to a discrete transitional area of  $\Omega_e$ . As explained in section 3.5, this approach combines the solution of the wave equation with the boundary conditions A1–Clayton’s condition for HABC-A1, and Higdon for HABC-Higdon. So, to derive the adjoint equations, let us start by considering boundary conditions on the truncated boundaries ( $\partial\Omega_{i_0}$ ,  $i_0 = 1, 2, 3$ ) that satisfy the A1–Clayton’s. In this case, the augmented functional is given by (3)–~~

~~On integrating it by parts, one arrives at:~~

$$400 \quad \underline{\nabla_u[\mathcal{L}(u, u^\dagger, m)]u' = \nabla_u[I(m)]u' - \int_{\tau} \int_{\Omega} (mu_{tt}^\dagger - \nabla^2 u^\dagger) \cdot u' dV dt + \mathcal{B}},$$

~~where~~ On employing the HABCs methods, the adjoint wave equation is defined by (5), ~~reaching~~  $\nabla_u[\mathcal{L}(u, u^\dagger, m)]u' = \mathcal{B}$ . ~~On adopting which satisfies~~ the boundary condition at the free surface ~~(A4)–, and zero initial conditions of the forward and adjoint~~



variables, it yields:-

$$\underline{\nabla_u [\mathcal{L}(u, u^\dagger, m)] u'} = - \int_{\tau} \int_{\partial\Omega_{i_0}} [-u^\dagger (\nabla u') + \nabla u^\dagger u'] \cdot \mathbf{n} \, dS dt.$$

405 In the truncated boundaries,  $\partial\Omega_{i_0}$ , A1-Clayton's boundary condition reads-

$$\underline{\frac{1}{c} \frac{\partial u'}{\partial t} + \nabla u' \cdot \mathbf{n} = 0,}$$

which implies  $\nabla u' \cdot \mathbf{n} = -\frac{1}{c} \frac{\partial u'}{\partial t}$ . Hence, the right side term of eq. (A22) is rewritten as :-

$$\underline{- \int_{\tau} \int_{\partial\Omega_{i_0}} -u^\dagger \left( -\frac{1}{c} \frac{\partial u'}{\partial t} \right) + (\nabla u^\dagger u') \cdot \mathbf{n} \, dS dt.}$$

Next, the integration by parts with respect to time can be applied and given by (29) and the initial conditions reads as in

410 eq. (A22) becomes:-

$$\underline{\frac{\partial}{\partial u} [\mathcal{L}(\mathbf{u}, \mathbf{u}^\dagger, m)] u'} = - \int_{\tau} \int_{\partial\Omega_{i_0}} \frac{1}{c} \frac{\partial u^\dagger}{\partial t} u' + (\nabla u^\dagger u') \cdot \mathbf{n} \, dS dt,$$

28). For HABC-A1 method, the truncated boundaries,  $\partial\Omega_{i_0}$ , have the following condition:

$$\underline{\frac{1}{c} \frac{\partial u^\dagger}{\partial t} + \nabla u^\dagger \cdot \mathbf{n} = 0.}$$

since  $u(\mathbf{x}, 0) = u^\dagger(\mathbf{x}, t_f) = 0 \, \forall \mathbf{x} \in \Omega$  is satisfied. Lastly, on imposing  $\frac{1}{c} \frac{\partial u^\dagger}{\partial t} + \nabla u^\dagger \cdot \mathbf{n} = 0$ , the extremum  $\frac{\partial}{\partial u} [\mathcal{L}(\mathbf{u}, \mathbf{u}^\dagger, m)] u' = 0$

415 is then realized-

The same approach may be employed to obtain the adjoint wave equation in the case where the Higdon boundary condition is imposed on the truncated boundaries Whereas for HABC-Higdon, the boundary condition at  $\partial\Omega_{i_0}$ . Therefore, the adjoint wave equation is defined by eq. (5). Also, on imposing the boundary condition at the free surface (A4), zero initial conditions for the forward ( $u$ ) and adjoint ( $u^\dagger$ ) variables, the gradient is reduced to eq. (A22). So, based on Higdon (1986), Higdon's boundary

420 condition was proposed by considering the wave propagating outward at an angle of incidence  $\alpha$ . In a two-dimensional domain, the wave solution was described by  $u = f(x \cos \alpha + y \sin \alpha + ct)$ . Hence, the generalized boundary condition is-

$$\underline{\Pi_{j=1}^p \left( \cos(\alpha_j) \left( \frac{1}{c} \frac{\partial}{\partial t} - (\mathbf{n} \cdot \nabla) \right) u(\mathbf{x}, t) \right) = 0,}$$

is read as:

$$\underline{\Pi_{j=1}^p \left( \cos(\alpha_j) \left( \frac{1}{c} \frac{\partial}{\partial t} - (\mathbf{n} \cdot \nabla) \right) u^\dagger(\mathbf{x}, t) \right) = 0,}$$

425 such that  $|\alpha| \leq \frac{\pi}{2}$  for all  $j$ . That allows to write  $\nabla u' \cdot \mathbf{n} = -\cos \alpha \frac{1}{c} \frac{\partial u'}{\partial t}$ . The boundary condition above is written in general form. In this work, we employ in both forward and adjoint solver, the order 2 ( $p = 2$ ) and the eq. (A22) as follows:-

$$\frac{\partial}{\partial u} [\mathcal{L}(\mathbf{u}, \mathbf{u}^\dagger, m)] u' = - \int_{\tau} \int_{\partial \Omega_{i_0}} u^\dagger \left( \cos \alpha \frac{1}{c} \frac{\partial u'}{\partial t} \right) + (\nabla u^\dagger u') \cdot \mathbf{n} dS dt.$$

On integrating it by parts in time, the above equation becomes :-

$$\frac{\partial}{\partial u} [\mathcal{L}(\mathbf{u}, \mathbf{u}^\dagger, m)] u' = - \int_{\tau} \int_{\partial \Omega_{i_0}} \cos \alpha \frac{1}{c} \frac{\partial u^\dagger}{\partial t} u' - (\nabla u^\dagger u') \cdot \mathbf{n} dS dt.$$

430 As a result of it, on imposing  $\cos \alpha \frac{1}{c} \frac{\partial u^\dagger}{\partial t} \nabla u^\dagger = 0$ , the extreme  $\frac{\partial}{\partial u} [\mathcal{L}(\mathbf{u}, \mathbf{u}^\dagger, m)] u' = 0$  is attained and the generalization-

$$\prod_{j=1}^p \left( \cos(\alpha_j) \left( \frac{1}{c} \frac{\partial}{\partial t} - (\mathbf{n} \cdot \nabla) \right) u^\dagger(\mathbf{x}, t) \right) = 0,$$

may be imposed as boundary conditions on the adjoint wave problem angles 0 and  $\pi/4$ .

After setting the adjoint counterparts to A1 Clayton's and Higdon boundary conditions as shown in Appendix A3, the adjoint HABC approach is completed using a similar process of forward problem. In summary, once the adjoint is solved inverse in  
 435 time, assume  $u^\dagger(\mathbf{x}, t + \Delta t)$  is known at instant  $t + \Delta t$  in all the extended  $\Omega$  domain, update it to  $u^\dagger(\mathbf{x}, t)$  using the usual Adjoint Acoustic Wave Equation over  $\Omega$ , then construct the auxiliary functions  $u_k^\dagger(\mathbf{x}, t)$  for each region, from  $A_M$  to  $A_1$ , applying the A1 or Higdon conditions for each region. As in the forward problem, we construct each update of the solution to the adjoint problem, at each region  $A_k$ , with a convex combination using a weight  $\omega_k$ ,

$$\tilde{u}^\dagger(\mathbf{x}, t) = (1 - \omega_k) u^\dagger(\mathbf{x}, t) + \omega_k u_k^\dagger(\mathbf{x}, t), \quad (31)$$

440 where  $\tilde{u}^\dagger(\mathbf{x}, t)$  will be used as the new  $u^\dagger(\mathbf{x}, t)$  for the next region ( $A_{k-1}$ ).

This derivation shows, once more, the self-adjoint nature of the adjoint problem with HABC-A1 or HABC-Higdon.

## 5 Computational Framework

The numerical simulations were carried out using the Devito software (Louboutin et al., 2019; Luporini et al., 2018; Kukreja et al., 2016). According to its own website, Devito is a Python package that combines a domain-specific Language (DSL) and  
 445 a full code generation framework. It is especially geared towards the design of highly optimized finite difference kernels, for its use in inverse problems. It makes use of SymPy to allow symbolic definition of operators at a high-level notation, and then it generates optimized code that is automatically tuned to specified computer architectures.

### 5.1 Coding framework

In general, symbolic computation is a powerful tool, as it allows users to build complex solvers in only a few lines of high-  
 450 level code. However, symbolic computation is usually impractical, from a computational performance point of view, for most

complex applications. On the other hand, considering the compilation of a high-level symbolic solver into a highly optimized low-level code, with adjustable stencil discretization at run-time, one should be able to develop computationally efficient methods, reducing the coding development time. This is the ~~underling-underlying~~ goal of Devito. Here we highlight the main aspects that concern this work with respect to software development in Devito.

455 In this work, we use the main Devito backend as driver, but implement all methods using only high-level symbolic methods available from Devito. This allows methods to be easily modified by interested users. Our implementation is described in details in the ABC Devito tutorials, available in the master branch of Devito <sup>1</sup>.

Due to the simplicity of working with symbolic equations, the code development can be accomplished with minor modifications of existing codes in Devito for typical acoustic wave propagation. We highlight in Figure 5.2 the main implementation characteristics. The differential operators have a syntax related to their original structures, such as  $dt$ ,  $dt^2$ ,  $dx$ ,  $dz$ , *Laplace*,  
460 for instance. Their corresponding Finite Difference approximations (Fornberg, 1988) can then be picked by the user among many available, or custom designed, schemes for each operator. ~~An important resource of Devito for ABCs is the possibility of partitioning the domain of interest into subdomains, to which distinct attributes can be assigned.~~

The creation of space-dependent (*Function*), space-time dependent (*Timefunction*) and other types of fields is done as a  
465 pre-processing step. It amounts to setting the properties linked to that field, such as, for instance, spatial order, temporal order, staggering type, floating number type, among other specific properties of each field.

The term *op* described in Figure 5.2 represents the time evolution operator for a given set of symbolic equations, and is where all the backend compilation, optimization, and running of Devito takes place. At this point, a user defines a number of time-steps and its size ( $dt$ ). In that operator, one places the elements called *stencils*, which represent the differential equations  
470 that are applied to each particular subdomain. Furthermore, the *op* carries the natural boundary conditions (*bc*), forcing terms (*src\_term*) and information about the receivers (*rec\_term*).

An important resource of Devito for ABCs is the possibility of partitioning the domain of interest into subdomains, to which distinct attributes can be assigned. The additional PDE's originated from the ABCs methods PML, CPML and HABC's were solved only in the extended domain (blue region) as exemplified in Figure 1, considering their particular structure. In the case of Damping, PML, and CPML methods, the pure Acoustic Wave Equation was solved in the main domain (white domain), and the modified Acoustic Wave Equation, that is, the equation that includes auxiliary functions and/or damping functions, as well as the equations for the auxiliary functions, are solved only in the extension (blue region) where they really are required. In the case of HABC's methods, as we showed before, we solved the pure Acoustic Wave Equation over all the domains (white and blue region), but the additional equations for the boundaries are solved only in the extension domain (blue region), to be  
475 later combined with the original solution through a convex procedure, as was previously described. The possibility of creating specific subdomains allows us to save time and memory for the computations.

---

<sup>1</sup>PML Jupyter notebook example: [nbviewer.org/github/devitocodes/devito/blob/master/examples/seismic/abc\\_methods/03\\_pml.ipynb](https://nbviewer.org/github/devitocodes/devito/blob/master/examples/seismic/abc_methods/03_pml.ipynb)

## 5.2 Computational performance

Devito uses Python as frontend, to allow ease of code development, and C/C++ as backend language for optimized computational runtime. Architecture dependent optimizations are possible, and parallel distribution of task also. To date, Devito allows  
485 parallelization with OpenMP (`DEVITO_LANGUAGE=openmp`), MPI (`DEVITO_MPI=n`, where  $n$  is the number of nodes) and some GPGPU compilation support.

In this work, simulations have been executed on the Mintrop HPC cluster, at the University of São Paulo. The computational executions were carried out on an AMD node, which has dual sockets AMD EPYC 7601 clocked at 2.2 GHz with 64 cores and 512GB of memory DDR4.

490 In FWI executions, the sources of ~~shot-waves~~ [shot-waves](#) ran in parallel with computing library Dask ([docs.dask.org/en/latest/](https://docs.dask.org/en/latest/)), where the number of tasks was equal to the number of sources. OpenMP-only was activated to solve the partial differential equations (PDEs) in parallel in the Devito framework. [The executions were performed by using C compiler GCC 8.3.0.](#)

495 Computational performance (wall-clock run time and memory usage) was measured using the Dask diagnostic performance tool.

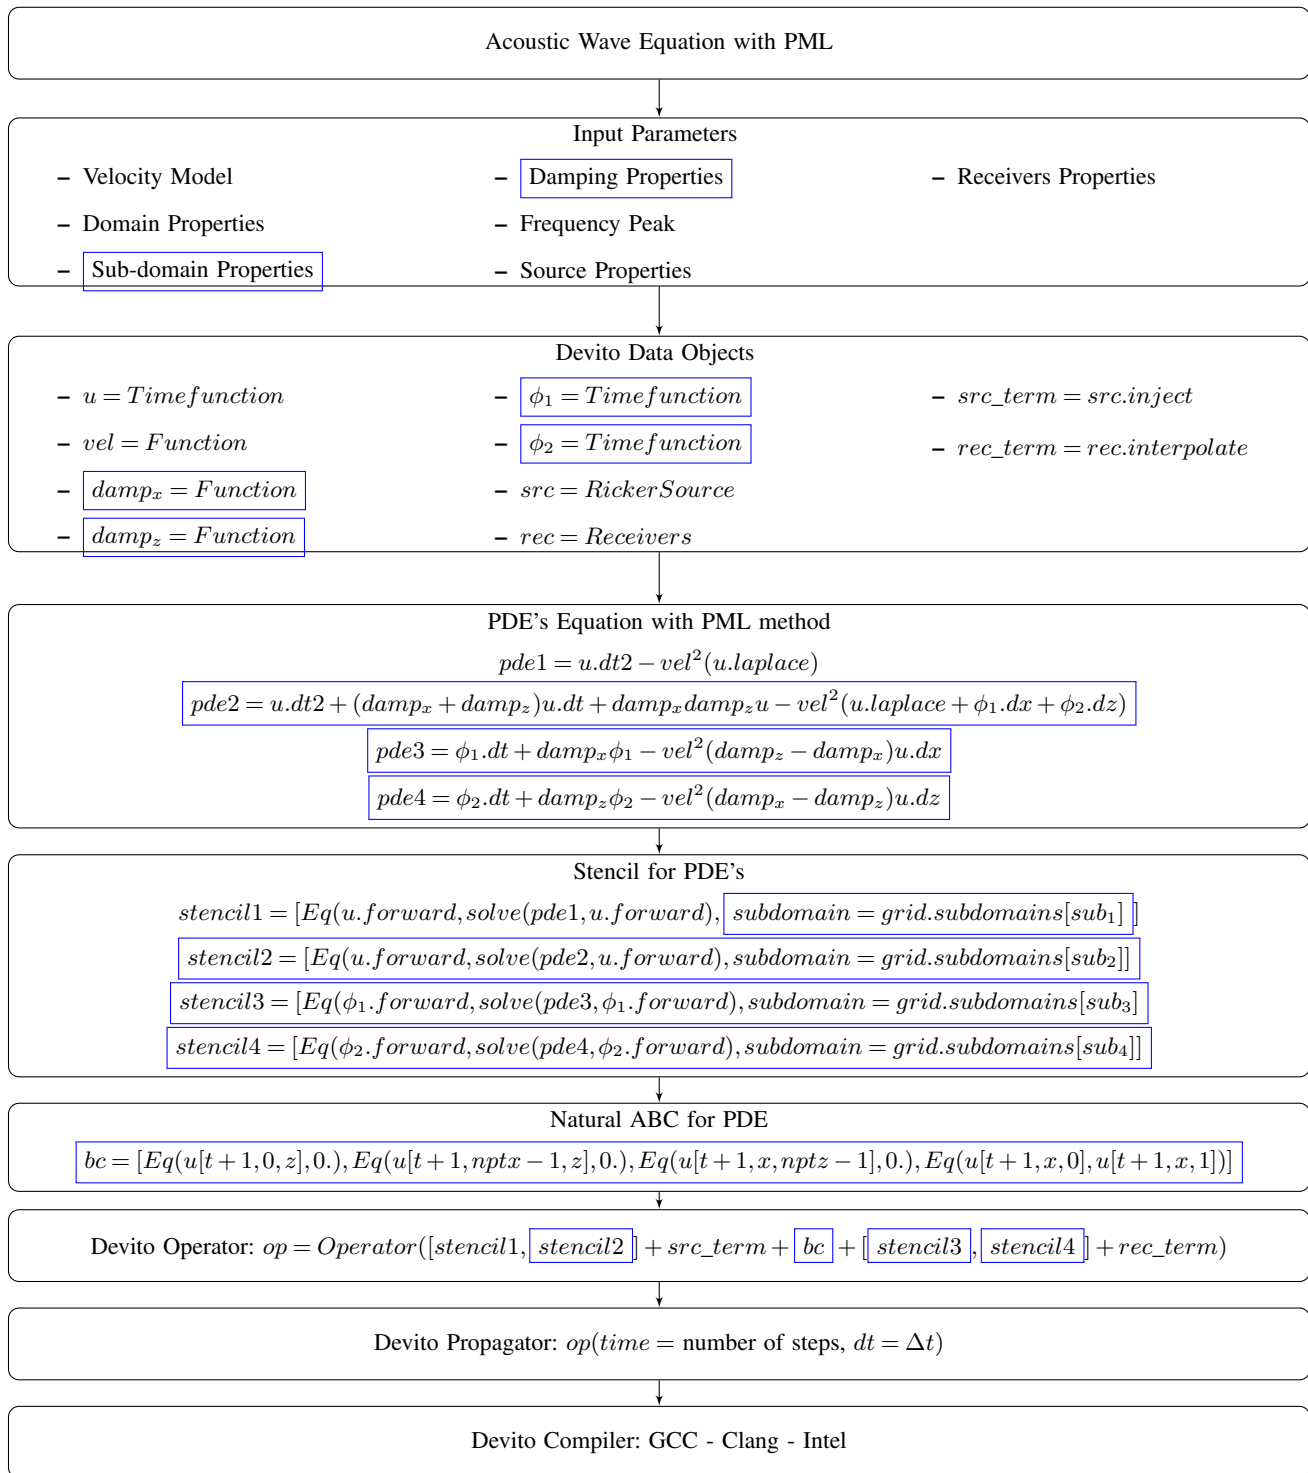

**Figure 4.** Example of logical implementation of PML method in the Devito coding framework. The diagram is similar to that of the original Devito development paper (Louboutin et al., 2019), but we highlight in blue boxes the kind of changes required for a PML implementation.

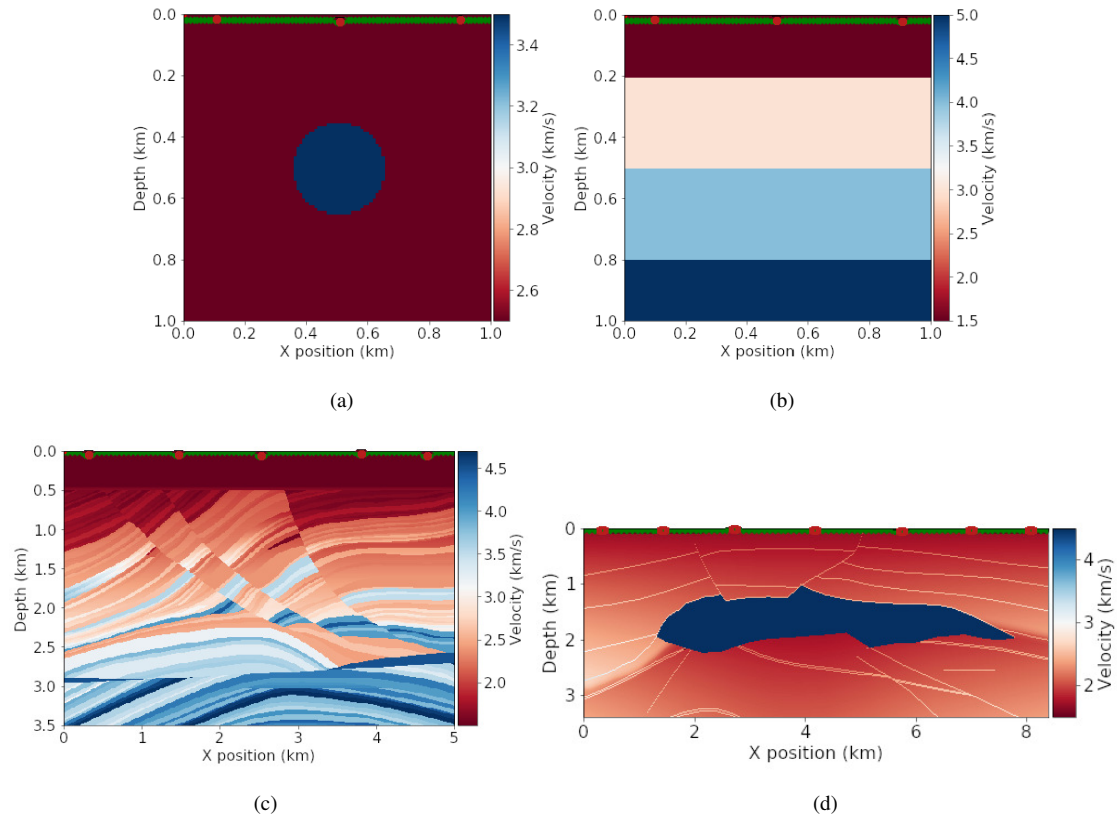

**Figure 5.** Velocity models: (a) circle; (b) horizontal layers; (c) part of Marmousi; (d) 2D SEG/EAGE. The red points illustrate the source positions, and the green points illustrate the receiver positions.

## 6 Analysis of ABCs

In this section, we assess the performance of the ABCs methods on the forward and adjoint wave equations. In the literature, analyses of ABCs are usually limited to the homogeneous velocity model (Gao et al., 2017; Grote and Sim, 2010; Liu and Sen, 2012). Also, to the best of our knowledge, those conditions have not yet been assessed for their role in the adjoint problem. In  
500 the present work, we propose to do precisely that: to evaluate ABCs for heterogeneous velocity models and to do so for the adjoint problem, as well.

The objective is to carry out the ABCs analysis for the usual setup adopted in a FWI problem, e.g., on considering hetero-  
505 genous velocity models. These are illustrated in Figure 5, they are respectively referred to as circle, horizontal layers, part of Marmousi (Martin et al., 2006) and a 2D SEG/EAGE salt (Aminzadeh and Brac, 1997). The placement of receivers and sources follows the usual configuration adopted in the literature to run a FWI case (Virieux and Operto, 2009). That is, sources and receivers located closer to the free surface. Tables 1 present the numerical setup that was used to run the analyses of both forward and adjoint solutions with the ABCs.

|                                |                                                    |
|--------------------------------|----------------------------------------------------|
| Velocity models                | Part of Marmousi                                   |
| Physical domain size           | $L_x = 5.0Km, L_z = 3.5Km$                         |
| Total time                     | $t = 6.4s$                                         |
| Source number ( $n_s$ )        | 5                                                  |
| Receiver number ( $n_r$ )      | 350                                                |
| Source positions $[x, z](m)$   | $[(100 + i \times 960), 0.125], i = 0, \dots, n_s$ |
| Receiver positions $[x, z](m)$ | $[(100 + i \times 48), 0.225], i = 0, \dots, n_r$  |
| Mesh spacing (m)               | $\Delta x = \Delta z = 10m$                        |
| Velocity models                | Circle and Horizontal layers                       |
| Physical domain size           | $L_x = L_z = 1Km$                                  |
| Total time                     | $t = 1.0s$                                         |
| Source number ( $n_s$ )        | 3                                                  |
| Receiver number ( $n_r$ )      | 100                                                |
| Source positions $[x, z](m)$   | $[(100 + i \times 266), 20], i = 0, \dots, n_s$    |
| Receiver positions $[x, z](m)$ | $[(100 + i \times 9.8), 30], i = 0, \dots, n_r$    |
| Mesh spacing (m)               | $\Delta x = \Delta z = 10m$                        |
| Velocity models                | 2D SEG/EAGE salt                                   |
| Physical domain size           | $L_x = 8.0Km, L_z = 3.5Km$                         |
| Total time                     | $t = 6.4s$                                         |
| Source number ( $n_s$ )        | 8                                                  |
| Receiver number ( $n_r$ )      | 550                                                |
| Source positions $[x, z](m)$   | $[(100 + i \times 960), 0.2], i = 0, \dots, n_s$   |
| Receiver positions $[x, z](m)$ | $[(100 + i \times 15), 0.5], i = 0, \dots, n_r$    |
| Mesh spacing (m)               | $\Delta x = 15m, \Delta z = 10m$                   |

**Table 1.** Setup used in the ABCs analyses.

The ~~reference fields used in all tests are~~ evaluations of the ABCs' effectiveness in attenuating the reflections used reference fields designed to keep boundary reflections from ever reaching the actual domain of interest. To achieve this, the computational domain for the reference solution is extended, and the simulated time is set in such a way that neither the forward nor the backward waves have enough time to reach the outermost boundaries. Figures 6 and 7 show the reference solutions of the forward and adjoint solvers, respectively. In none of the cases, the waves have had time to reach the truncated boundaries,  $\partial\Omega_{i_0}, i_0 = 1, 2, 3$  as illustrated in Figure 1. Therefore, the reference fields that are used as a base for comparisons are free of reflections. These extended regions should not be confused with the absorbing layers used for the boundary schemes tested here. The goal of this particular very large extended region is solely to define adequate reference solutions with no inbound reflected waves. ~~The quantitative error evaluation is~~

The reference solutions used to evaluate the ABCs' effectiveness in attenuating the reflections are referred to here as the accuracy references and these will be used to compute the quantitative error, given by the expression

$$E(s_{ref}, s) = \frac{\|s_{ref}(\mathbf{x}, t_f) - s(\mathbf{x}, t_f)\|_2}{\|s_{ref}(\mathbf{x}, t_f)\|_2}, \quad (32)$$

520 which computes the relative error of the forward/adjoint solution ( $u/u^\dagger$ ) using ABC, with the corresponding one in the reference field on the physical (inner) domain of interest ( $\Omega_0$ ). The variables  $s_{ref}(\mathbf{x}, t_f)$  and  $s(\mathbf{x}, t_f)$  represent respectively the accuracy reference solution and that which has made use of a particular ABC. The value  $t_f$  is the final time of simulation.

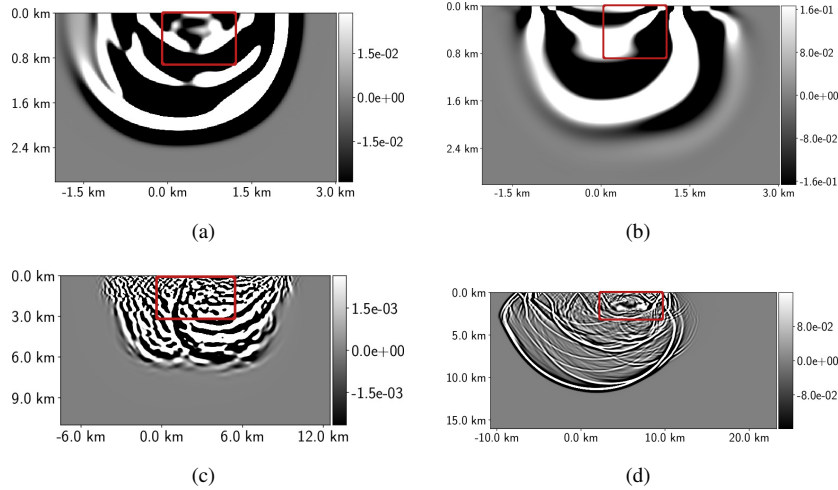

**Figure 6.** Reference solutions of the forward wave equation ( $u$ ): (a) circle velocity model at  $t = 1s$ ; (b) horizontal layers velocity model at  $t = 1s$ ; (c) part of Marmousi velocity model at  $t = 6.4s$ ; (d) 2D SEG/EAGE salt velocity model at  $t = 6.4s$ . The regions inside the red square are the physical domains, with the red lines indicating the boundaries ( $\partial\Omega_0$ ), and the regions outside are the extended domains.

The ABCs were applied to domain extensions defined in terms of the physical domain length in  $x$  direction,  $l_x = |x_F - x_I|$ . The extension width  $l_w$  was set as a percentage  $p$  of  $l_x$ , i.e.,  $l_w = (p/100) \times L_x$ . Moreover, the same extension  $l_w$  applies to the depth of the domain, in the  $z$  direction. The range of  $p$  was taken to be  $1 < p < 20$ . Previous works (Gao et al., 2017; Liu and Sen, 2018), have taken the number of points in the domain extension  $pn_e$ , instead, as a measure of its size. Then,  $pn_e$  was picked between 5% and 10% of the number of points in the physical domain. Yet, that also meant an extension between 5% and 10% of the original domain length, since square domains with uniform grid spacing were usually adopted to carry out the analyses (Gao et al., 2017; Liu and Sen, 2018). Therefore, the range of domain extensions here is consistent with that of  
530 previous works.

To exemplify the choice of  $l_w$ , consider the domain of the circle velocity model (plotted in Figure 5(a)). In this case,  $l_x = 1Km$  and, at  $p = 2$ , the width  $l_w = (p/100) \times l_x = (2/100) \times 1Km = 20m$ . At  $p = 2$ , the extended domain has the width  $l_w = 20m$  in  $x$  and  $z$  directions, which means  $pn_e = 2$  for the mesh grid  $\Delta x = \Delta z = 10m$ .



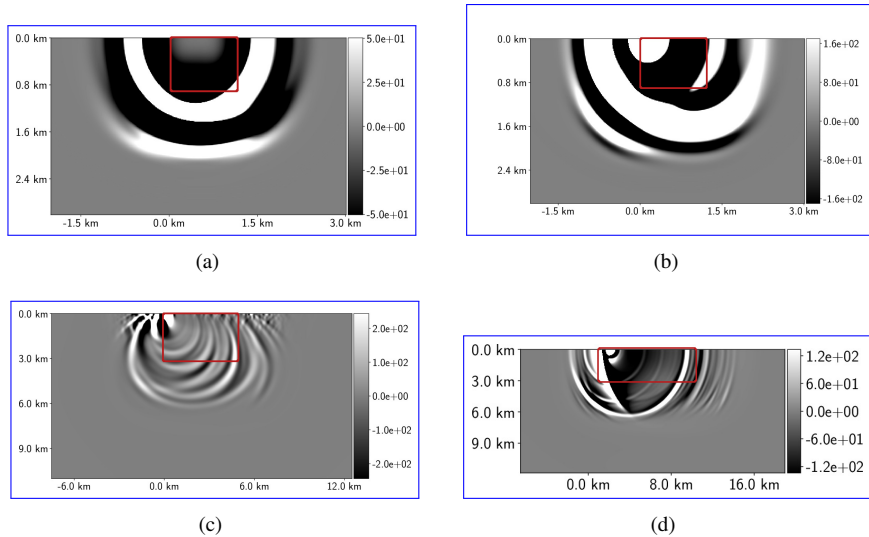

**Figure 7.** Reference solutions of the adjoint  $u^\dagger$  wave equation related to the velocity models: (a) circle velocity model at  $t = 1s$ ; (b) horizontal layers at  $t = 1s$ ; (c) part of Marmousi velocity model at  $t = 6.4s$ ; and (d) 2D SEG EAGE salt at  $t = 5s$ . The regions inside the red square are the physical domains, with the red lines indicating the boundaries ( $\partial\Omega_0$ ), and the regions outside are the extended domain.

In the extended domain, the velocity model  $c$  was built by employing a constant extrapolation of the physical values of  $c$  in the boundary points  $x \in [x_I, x_F]$  and  $z = z_F$ ,  $x = x_I$  and  $z \in [z_I, z_F]$ , and  $x = x_F$  and  $z \in [z_I, z_F]$ .

## 6.1 Forward Wave Equation

As a first step, a fixed  $l_w$  and various frequency peaks  $f$  of a Ricker wavelet are considered for an error analysis. The extended domain width was chosen to keep the major portion of the curves  $\log_{10} E(u_{ref}, u)$  below 1, where  $E(u_{ref}, u)$  is given by eq. (32).

Figure 8 depicts  $\log_{10} E(u_{ref}, u) \times f$ . In essence, it shows that the frequency peak bears on the effectiveness of the ABCs methods. One notices in Figs. 8 (c) and (d) that, for more realistic velocity models (part of Marmousi and 2D SEG/EAGE salt), the error grows with  $f$  for the PML, CPML and HABC-Higdon. For simpler models such as the circle and the horizontal layers, the error also exhibits a slight growth, but only for the PML and CPML methods. It is also clear in Fig. 8 that the HABC-Higdon incurs smaller errors. For the more realistic models, PML and CPML have gotten closer to HABC-Higdon. Whereas the damping method consistently exhibits the highest errors.

In order to ascertain whether similar behavior would be seen for different sizes of domain extension, the next test assesses the ABCs performance as a function of  $l_w$ . On accounting for the previous evidence of the peak frequency  $f$  effects upon performance, this test only includes the more realistic models, namely, the part of Marmousi and the 2D SEG/EAGE salt.

Figure 9 depicts  $\log_{10} E(u_{ref}, u)$  as a function of  $p$ , and the  $l_w$  thereof. The errors decrease as  $p$  increases. Once again, the relative errors grow with  $f$  for PML, CPML, and HABC-Higdon alike. This behavior is observed in both Marmousi and 2D

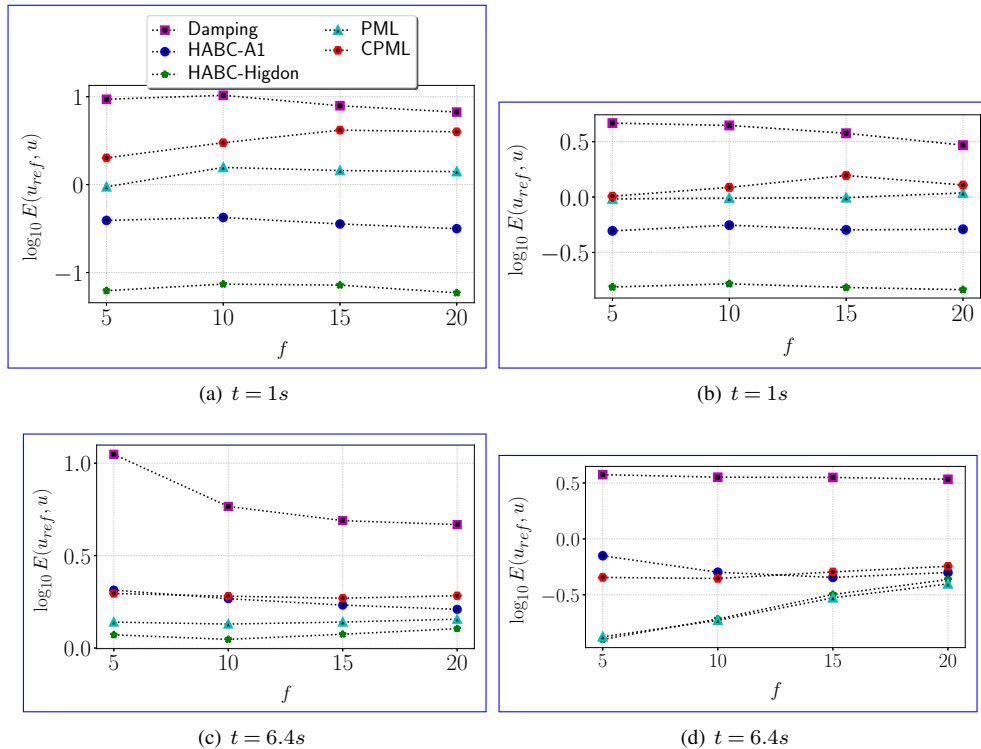

**Figure 8.** Error curves of the forward solution ( $u$ ) with respect the frequency peak  $f$  of Ricker wavelet. The analyses considered the wave solutions for the velocity models: circle (a); heterogeneous model built with horizontal layers (b); part of Marmousi model (c); 2D SEG/EAGE salt velocity model (d).

SEG/EAGE salt velocity models. On the other hand, the errors decrease as  $f$  grows, for the Damping method. The Damping and HABC-A1 errors approximate those of the other ABCs (PML, CPML and HABC-Higdon) as  $f$  grows, especially for the part of Marmousi model. Figure 9 (a) shows the PML and CPML errors much closer to each other. Whereas in 2D salt model, Figure 9 (b) shows PML lower error than that of the CPML. In all cases, the HABC-Higdon incurs errors that are either similar or smaller than those of the PML and CPML, while those of the Damping method are the highest.

## 6.2 Adjoint Wave Equation

The previous section presented analyses of the ABCs' performance in the context of the forward wave equation. Here, we consider their performance in the adjoint wave equation, which is referred to as the backward problem.

The adjoint forcing term is given by  $d = (u^{obs} - u)\delta(\mathbf{x} - \check{\mathbf{x}})$ . In that expression,  $u^{obs}$  represents the observed, recorded, data from the true velocity model, whereas  $u$  stands for an initial velocity model— henceforth termed guess velocity model. Any nonzero difference between them, and the forcing term,  $d$ , will give rise to a non-trivial solution. Hence, in the analysis

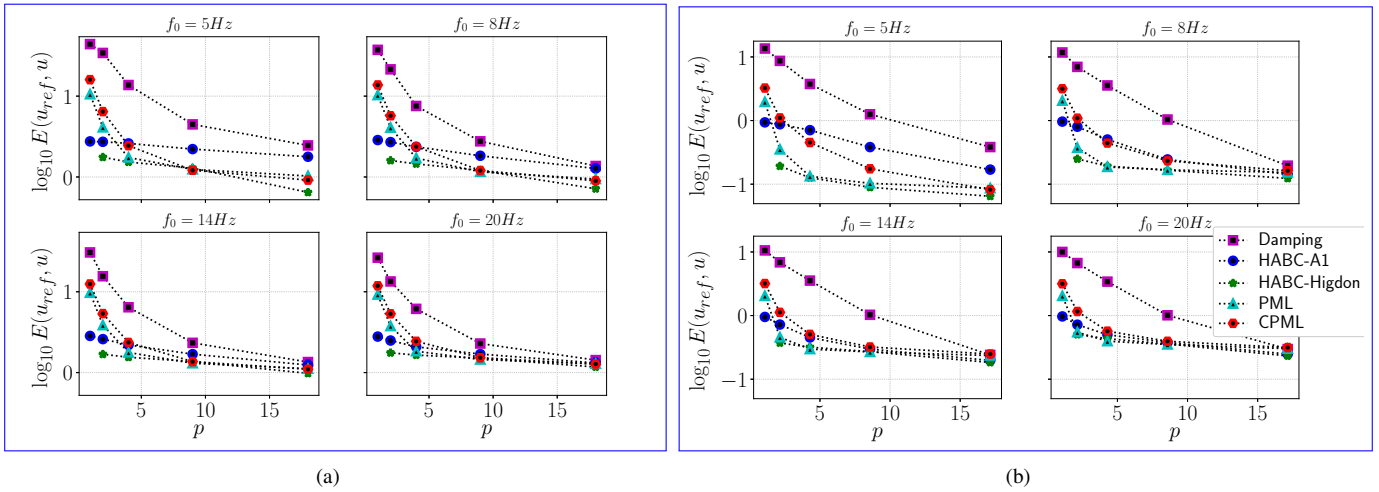

**Figure 9.** Error curves of the forward solution ( $u$ ) with respect to  $p$  (percent of  $L_x$ ) for different peak of frequency  $f_0$ . The analyses considered the wave solutions for the velocity models: (a) part of Marmousi model; (b) 2D SEG/EAGE salt.

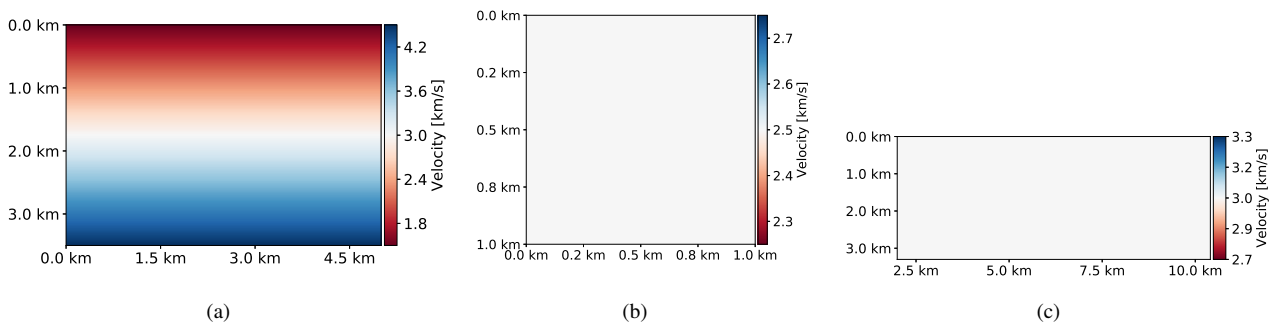

**Figure 10.** Initial guess of velocity model: (a) part of Marmousi (linear initial guess model); (b) circle and horizontal layers velocity models (constant initial velocity of 2.5 Km/s); and (c) 2D SEG/EAGE salt (constant initial velocity of 3Km/s).

that follows,  $u^{obs}$  is based on the models shown in Figure 5 (true velocity), while  $u$  is computed from the models shown in Figure 10 (guess velocity).

The following steps are taken to assess the adjoint ABCs performance: A reference adjoint solution is computed in the reference enlarged domain, to avoid spurious reflections; next, adjoint solutions subject to the various ABCs are computed, and their errors with respect to the [accuracy](#) reference are evaluated by eq. (32). Figure 11 shows the curves of  $\log_{10} E(u_{ref}^\dagger, u^\dagger) \times f$ . In 2D SEG/EAGE velocity model, the PML, CPML and HABC-Higdon errors grow with  $f$ . Somewhat surprisingly, the errors get closer than that of the Damping method, for higher values of  $f$ , as shown in Fig. 11 (d). In circle velocity model, Fig. 11 (a) shows only the PML and CPML errors growing with  $f$ . In several cases, HABC-Higdon errors are either close or smaller than the PML errors. Figure 12 presents error curves with respect to the domain extension parameter  $p$ , for distinct frequency peaks  $f$ . In all cases, the error diminishes as  $p$  increases. For part of Marmousi velocity model, Figure 12 (a) shows the PML, HABCs and Damping errors dropping as  $f$  grows, whereas CPML errors rise with  $f$ . For 2D SEG/EAGE, Figures 12 (b) shows the ABCs errors going up with  $f$ .

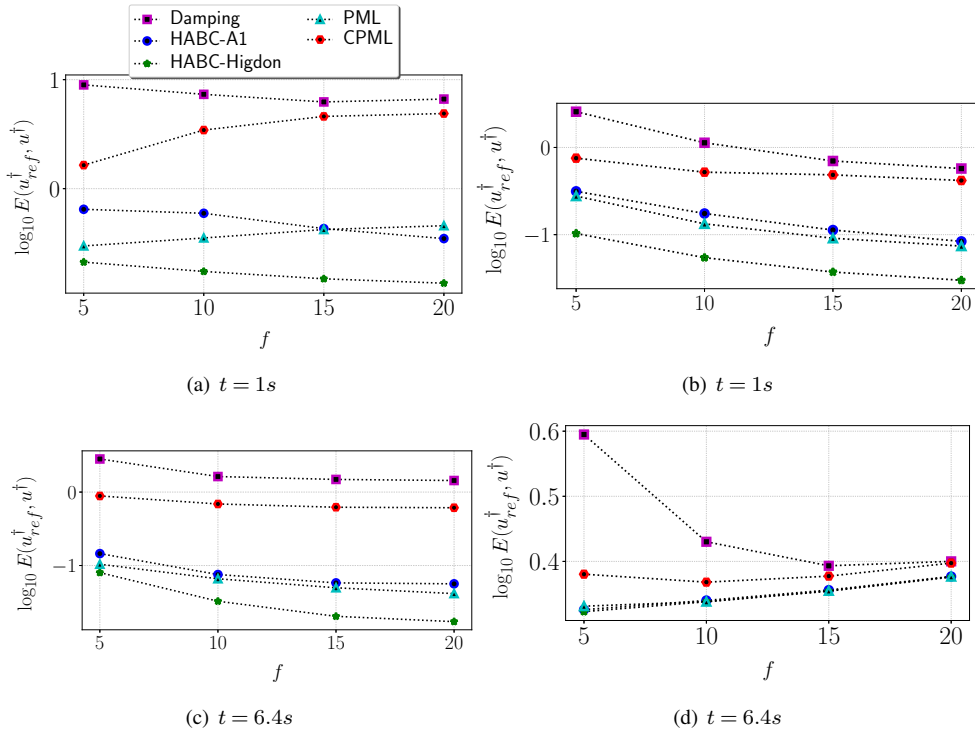

**Figure 11.** Error curves of the adjoint solution  $u^\dagger$  with respect to peak of frequency. The tests consider the wave solutions for the velocity models: (a) circle; (b) heterogeneous model built with horizontal layers; (c) part of Marmousi model; and (d) 2D SEG/EAGE salt.

Similar to the forward problem, the frequency peak  $f$  bears on the adjoint ABCs' effectiveness, as well. Moreover, the HABC-Higdon error has shown to be either smaller than or close to that of the PML. It also appears that the CPML has not

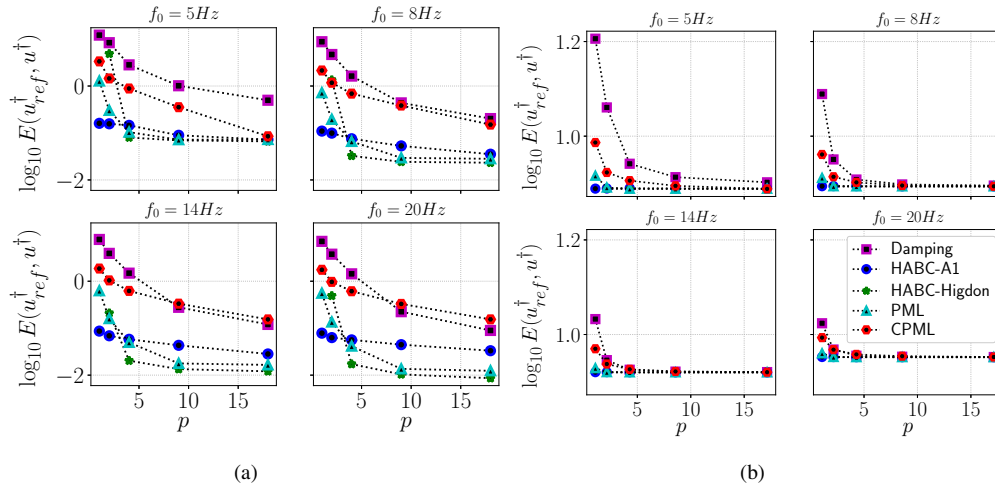

**Figure 12.** Error curves of the adjoint solution  $u^\dagger$  with respect to  $p$  (percent of  $L_x$ ) for different frequency peaks. The tests consider the wave solutions for the velocity models: (a) part of Marmousi model; and (b) 2D SEG/EAGE salt.

been quite effective in the adjoint problem. That can be noted especially for the part of Marmousi velocity model, where its errors are the highest for higher frequency peaks  $f$ .

In conclusion, the adjoint problem experiences its own spurious boundary reflections, as well as those from the forward solution, which are carried over into the adjoint solution via the external forcing term. The latter depends on the forward wave solution ( $u$ ) stored in the receivers, as can be verified in the adjoint equation shown in eq. (1).

580

### 6.3 Computational cost: memory usage and time of simulation

Given the above diversity of ABC characteristics, a question naturally arises as to their computational costs and memory usage. This section addresses precisely those topics. To that end, the range  $1 \leq p \leq 20$  was adopted to run the forward solver, subject to ABCs. Part of Marmousi was the chosen velocity model for the experiments, with the setup shown in Table 1. Section 5.2 describes the settings, as libraries and machines, used in the computational performance measures.

585

Table 2 shows the average wall-clock runtime of simulations and the memory usage of a computational reference case, which used homogeneous Dirichlet boundary conditions (A3), and no ABCs were employed. That is, the tests were performed in the physical domain  $\Omega_0$  only, without any extensions. Such case is henceforth referred to as the no-ABC case, and it is used as a reference for comparison with computational reference to evaluate the growth of the memory usage and wall-clock time of the cases that are subjected to the various ABC methods.

590

Figures 13(a) and 13(b) present results of such comparison, in the form of a relative increase in percentage of the time of simulation  $t_g$  and memory usage  $m_g$  of the ABCs, as compared to the no-ABC reference. Figure 13(a) shows that the growth of memory usage associated with the Damping method remains below 5% within the whole range of domain extensions,  $p$ .

| Peak of memory usage (GB) | time of simulation (s) |
|---------------------------|------------------------|
| 0.36                      | 16.6                   |

**Table 2.** Computational cost related to the execution of the forward solver when there is no employment of any ABCs methods. The velocity model was part of Marmousi with the settings shown in Table 1.

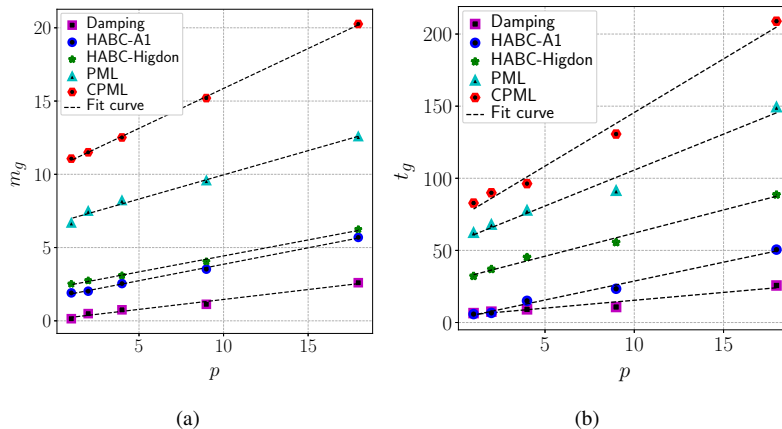

**Figure 13.** The percent growth of memory usage (a) and time of simulation (b), as compared to the no-ABC case. The measures are related to the execution of the forward solver. The velocity model was part of Marmousi with the settings shown in Table 1.

However, as noticed in Figures 14(a) and 14(b), curves of  $\log_{10} E(u_{ref}, u) \times m_g$  and  $\log_{10} E(u_{ref}, u) \times t_g$  presents the highest errors when the Damping method is employed.

The CPML method is far more expensive, due to the number of additional variables to be solved: at  $p \approx 1$ , Figures 13(a) and 13(b) show the memory usage increasing more than 10%, while time of simulation grows more than 80%. On evaluating  $\log_{10} E(u_{ref}, u) \times m_g$  and  $\log_{10} E(u_{ref}, u) \times t_g$ , Figures 14(a) and 14(b) show that the CPML errors are close to the PML errors, but the CPML computational performance has been more expensive than the PML.

The HABCs methods are more expensive than the Damping, but they have shown to attain lower values of  $m_g$  and  $t_g$  than those of the CPML and PML. In all cases, HABC-Higdon requires more time and memory usage than HABC-A1. However, Figures 14(a) and 14(b) depict the errors of HABC-Higdon smaller than that HABC-A1 errors for  $p > 1$ . Also, for  $p > 1$ , HABC-Higdon demands less wall-clock time and memory usage than that of PML and CPML, whereas its performance in decreasing the reflections (measured by  $\log_{10} E(u_{ref}, u)$ ) has been similar.

## 7 Analysis of ABCs in a FWI Problem

Taking into account the effectiveness plus computational time and memory usage, one observes that HABC-Higdon is a proper choice to be employed in an FWI execution. However, the Damping method has presented time of simulation and memory usage much smaller than the other ABCs. Besides that, the PML method is commonly employed in FWI works (Abubakar

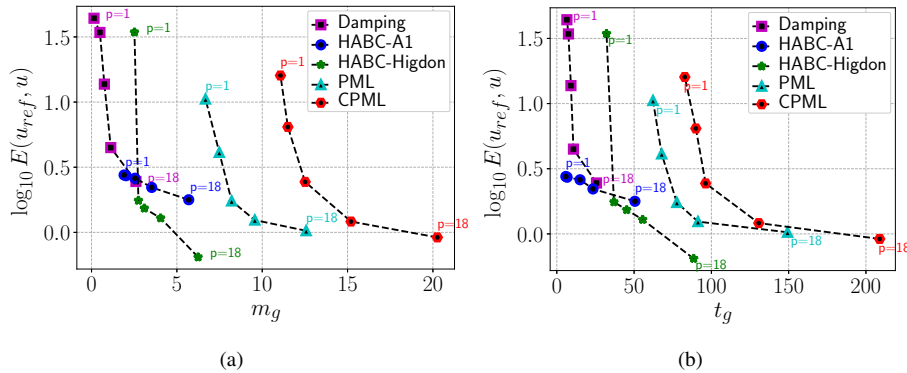

**Figure 14.** Analyses of  $\log_{10} E(u_{ref}, u) \times m_g$  (a), and  $\log_{10} E(u_{ref}, u) \times t_g$  (b). The measures are related to the execution of the forward solver. The velocity model was part of Marmousi with the settings shown in Table 1, and the peak of frequency  $f_0 = 5Hz$ .

et al., 2009; Asnaashari et al., 2012; Aghamiry et al., 2019; Ben-Hadj-Ali et al., 2011). Therefore, this section proposes to compare numerical results and the computational cost in FWI using Damping, PML and HABC-Higdon.

The FWI applications take the Marmousi as the true model. True receivers signals are obtained in the [accuracy](#) reference field, where the domain was extended to avoid spurious reflections.

The setup used to run this FWI case is presented in Table 3. The Marmousi velocity model and the initial model are respectively illustrated in Figures 16 (a) and (b). The first case evaluates the ABCs performance in FWI for a fixed peak of frequency  $f_0 = 7Hz$ . [The simulations were executed using the time-step of 0.001 seconds.](#) A sub-sampling approach with [ratio sampling ratio of  \$r = 5\$  \(which meets was employed, which satisfies the Nyquist criterion \)-was employed for peak of frequency  \$f\_0 = 7Hz\$  and time-step of 0.001 seconds.](#) The search algorithm has been the L-BFGS-B (Byrd et al., 1995), where the stop condition was the number of iterations. The extended domain width  $l_w$  was set according to Kaltenbacher et al. (2013), i.e.,  $l_w = max(c)/f = 4.7/7 \approx 0.67Km$  (equivalent to  $p \approx 4$ ).

Figure 15 shows the misfit and the error of the velocity model  $E_c$  of the FWI runs. In particular, the error  $E_c$  was computed by the expression:

$$E_c = \frac{\|c_{true} - c_{comp}\|_2}{\|c_{true}\|_2},$$

where  $c_{true}$  is the true velocity model, and  $c_{comp}$  is the computed velocity model provided by the FWI run. To evaluate  $E_c$ , the velocity models  $c_{true}$  and  $c_{comp}$  were both defined in the same mesh setup.

On comparing the performance of the HABC-Higdon to that of the PML, the results in Figures 15 show smaller values of  $I(m)$  and  $E_c$  for the former. Furthermore, Table 4 shows that the percent growth of memory usage and the wall-clock time related to the HABC-Higdon required significant less time and a slightly small memory usage compared with the PML. The reason for this better performance is basically due to the fact that the HABC-Higdon does not require additional variables and equations to be solved, which incur in both added computational time and memory usage. Therefore, it is proper to conclude that HABC-Higdon has shown better overall performance compared to PML.

| Velocity models                | Marmousi                                           |
|--------------------------------|----------------------------------------------------|
| Physical domain size           | $L_x = 17.0Km, L_z = 3.5Km$                        |
| Mesh spacing                   | $\Delta x = \Delta z = 10m$                        |
| Total time                     | $t = 5s$                                           |
| Source number ( $n_s$ )        | 40                                                 |
| Receiver number ( $n_r$ )      | 850                                                |
| Sources positions $[x, z](m)$  | $[(100 + i \times 420), 0.125], i = 0, \dots, n_s$ |
| Receiver positions $[x, z](m)$ | $[(100 + i \times 20), 0.225], i = 0, \dots, n_r$  |

**Table 3.** Setup used to carry out the numerical FWI simulations, which are used to compute the velocity models that are then matched with Marmousi.

Comparing the HABC-Higdon with respect to the Damping scheme, we note that the damping scheme with the same damping layer size as used in the HABC-Higdon ( $l_w = 0.67Km$ ) is considerably faster and uses less memory (see Table 4). This is mainly due to the computational overhead of HABC-Higdon having to successively apply boundaries conditions in nested domains, with added memory use due to a few auxiliary variables used in this nesting procedure. However, Figure 15 shows that  $I(m)$  and  $E_c$  of the HABC-Higdon (with  $l_w = 0.67Km$ ) are lower than those of the Damping, with the Damping scheme requiring a much larger damping layer to reduce the error. Particularly in Fig. 15 (b), it is clear that, even on increasing  $l_w$ , the Damping error  $E_c$  is still higher than that of the HABC-Higdon. Moreover, Table 4 shows that the percent growth of wall-clock time of simulation and memory usage of the Damping method with  $l_w = 2.5Km$  is significantly larger than that of the HABC-Higdon results with  $l_w = 0.67Km$ . Therefore, HABC-Higdon advantages seem twofold, in that it combines a good performance in mitigating spurious reflections with a relatively low computational cost.

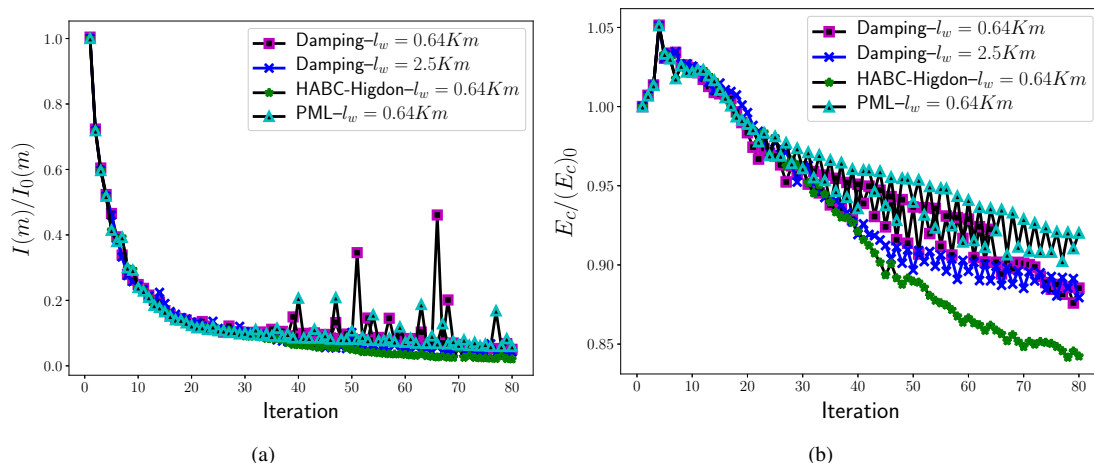

**Figure 15.** Comparisons of the misfit values  $I(m)/I_0(m)$  (a) and of the velocity model errors  $E_c/(E_c)_0$  (b) for velocity model computation that is then matched with Marmousi, where  $I_0(m)$  and  $(E_c)_0$  are the values obtained at the first iteration.



| ABC method                     | Time  | Memory |
|--------------------------------|-------|--------|
| Damping ( $l_w = 0.67Km$ )     | 14.6% | 25.2 % |
| Damping ( $l_w = 2.5Km$ )      | 94.6% | 112%   |
| PML ( $l_w = 0.67Km$ )         | 108%  | 29.2%  |
| HABC-Higdon ( $l_w = 0.67Km$ ) | 44%   | 27%    |

**Table 4.** The percent growth of wall-clock time and RAM memory usage, as compared to the no-ABC case ( $l_w = 0.0Km$ ). The measures are related to a source of a single shot wave of the FWI execution for the velocity model that is matched with Marmousi. In this case, the execution of FWI with no-ABC required 75 seconds of wall clock time, and 5GB of memory usage.

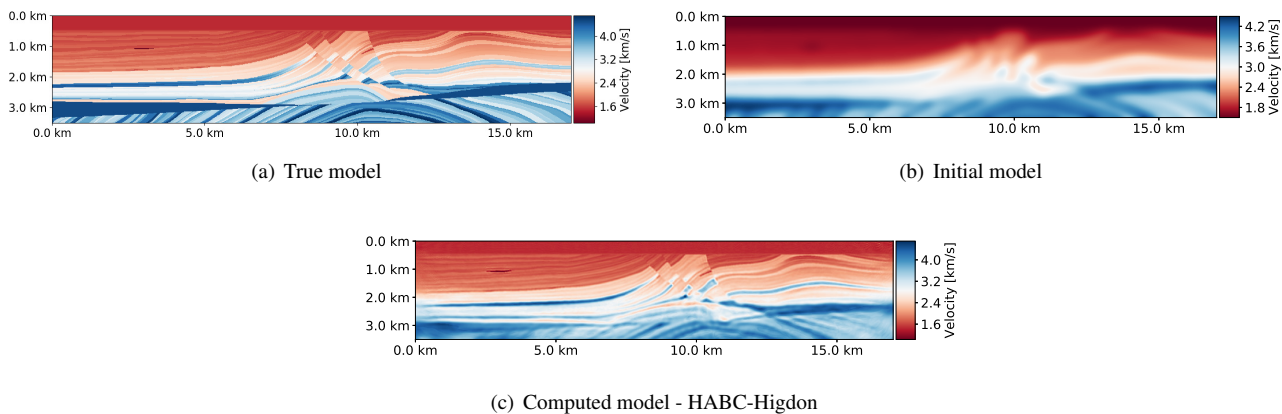

**Figure 16.** Velocity models comparisons.

A second case considers the peak of frequency  $f_0 = 15Hz$  and applies the multiscale approach in frequency (Bunks et al., 1995). The numerical setup is displayed in Table 3. The cut of frequencies are  $f_c = 3Hz$ ,  $f_c = 5Hz$  and  $f_c = 8Hz$ . The extended domain choice was based in the peak of frequency  $f_0 = 15Hz$ . Therefore, the extended domain had  $l_w = max(c)/f = 4.7/15 \approx 0.32Km$  (equivalent to  $p \approx 2$ ). The initial velocity model used in the FWI executions is displayed in Figure 16(b), and  $r = 4$  was set in the sub-sampling approach  $\dashv$

(also satisfying the Nyquist criterion for peak of frequency  $f_0 = 15Hz$  and time-step 0.001 seconds). Figures 17 and 18 present the misfit and the error of the velocity model. Once again, FWI with the Damping methods has shown the worst performance, the misfit values and the velocity errors are the highest. FWI executions with HABC-Higdon and PML have presented similar performance. Differences are observed in the velocity errors  $E_c$ , Figure 18(a) shows smaller errors associated to HABC-Higdon for cut of frequency  $f_c = 3Hz$ . Whereas for  $f_c = 5Hz$  and  $f_c = 8Hz$ ,  $E_c$  associated to the PML method has been smaller.

Once again, on evaluating the performance in mitigating the reflections and the computational cost that is presented in Table 5, one verifies the HABC-Higdon as a proper choice to be employed in an FWI execution.

655 Figure 16(c) shows the computed velocity models when the HABC-Higdon was employed. However, FWI executions were performed for all ABC methods. The computed velocity models were similar mainly when PML, CPML, and HABCs methods were applied. FWI with the damping method was more affected by the reflections originating in the truncated boundaries. In this case, the field of the computed velocity model was the furthest from the Marmousi model. Regarding the quantitative comparisons, the computed velocity model errors ( $E_c$ ) related to the HABC-Higdon have remained the smallest.

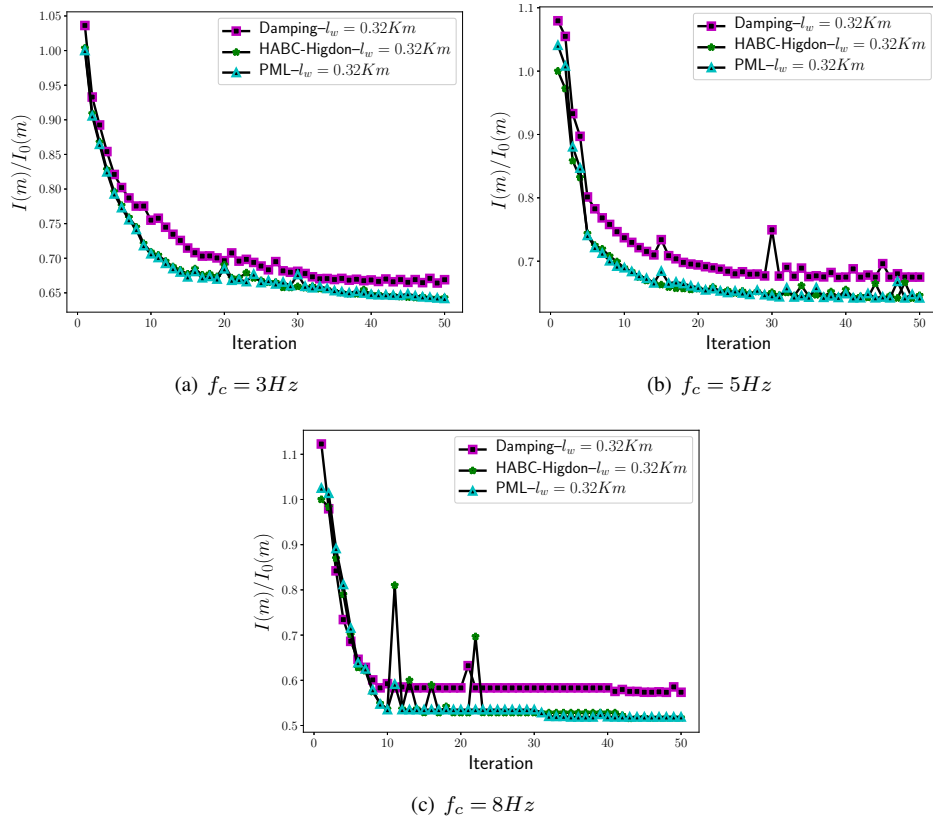

**Figure 17.** Comparisons of the misfit values  $I(m)/I_0(m)$  for velocity model computation that is then matched with Marmousi, where the peak of frequency is  $f_0 = 15Hz$  and multiscale approach in frequency (Bunks et al., 1995) is employed.  $I_0(m)$  is computed at the first iteration, which is the minimal misfit value given by the employment of the Damping, HABC-Higdon and PML methods.

## 8 Conclusions

660 This work evaluates the effectiveness of the ABCs methods in mitigating spurious boundary reflections, by employing a setting that is usually adopted in FWI applications. The analyses were carried out for the forward and adjoint wave equations, and our findings clearly show that the adjoint problem also experiences spurious boundary reflections. Indeed, that should be expected, owing to the hyperbolic character those equations share with their physical counterparts. In view of such evidence, we have

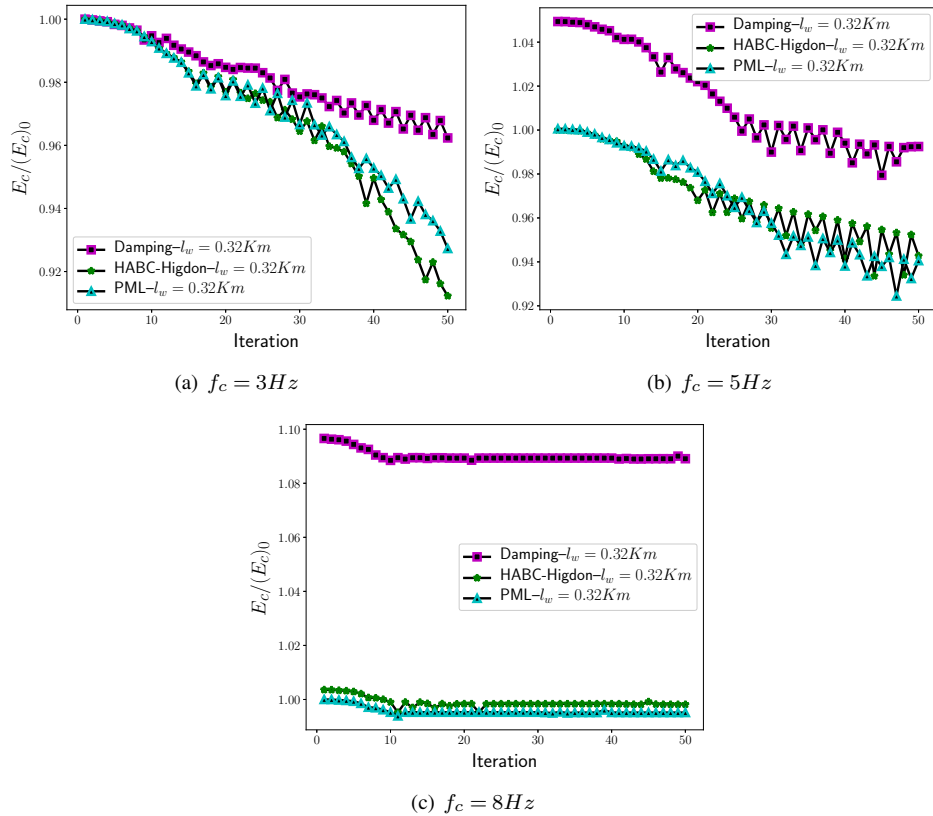

**Figure 18.** Comparisons of the misfit values  $E_c/(E_c)_0$  for velocity model computation that is then matched with Marmousi, where the peak of frequency is  $f_0 = 15Hz$  and multiscale approach in frequency (Bunks et al., 1995) is employed.  $(E_c)_0$  is computed at the first iteration, which is the minimal velocity error given by the employment of the Damping, HABC-Higdon and PML methods.

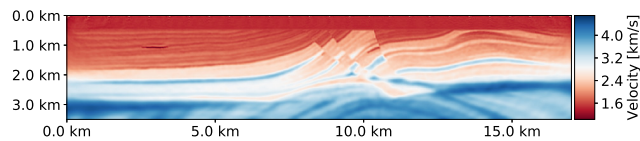

**Figure 19.** Velocity model computed by the FWI execution with HABC-Higdon and a multiscale approach (Bunks et al., 1995).

formally derived adjoint boundary conditions that correspond to each of the ABCs. This formulation of forward and adjoint problems, along with their corresponding ABCs, have been extensively tested to assess the effectiveness of the latter. A number of application cases has been run for heterogeneous velocity models, ranging from the simplest models to realistic ones.

Code development was carried out in the domain specific language ( $\text{\texttt{DLSDSL}}$ ) computational framework, Devito, which allows an ease of implementation of the absorbing conditions described here. Furthermore, these schemes are readily available

| ABC method                     | Time  | memory |
|--------------------------------|-------|--------|
| Damping ( $l_w = 0.32Km$ )     | 13.3% | 12.3%  |
| PML ( $l_w = 0.32Km$ )         | 94.6% | 14.9%  |
| HABC-Higdon ( $l_w = 0.32Km$ ) | 65%   | 13.2%  |

**Table 5.** The percent growth of wall-clock time and RAM memory usage, as compared to the no-ABC case ( $l_w = 0.0Km$ ). The measures are related to a source of a single shot wave of the FWI execution with the multiscale approach, for the velocity model that is matched with Marmousi. In this case, the execution of FWI with no-ABC required 75 seconds of wall clock time, and 6.11GB of memory usage.

in the Devito repository (see Devito tutorials on ABCs) to be used in more realistic problems, and they may be adapted to  
670 three-dimensional problems by means of symbolic operations, alone.

Analyses of the ABCs' effectiveness in the forward and adjoint problems have shown that the PML and HABC-Higdon are more effective for both of them. On the other hand, the Damping is the least efficient method in attenuating reflections. Figures 17 and 18 depict it as being less effective than the HABC-Higdon, even when an effort is made to improve matters, by increasing the size of the domain extension. The CPML method has presented higher errors than the PML and HABC-Higdon,  
675 and it has not kept a pattern, with different effectiveness on the forward and adjoint problems. For instance, Figure 9 shows smaller errors for the CPML than for the HABC-A1 and Damping methods. Yet, for the adjoint problem, Figure 12(a) shows CPML errors to be higher than those of the Damping, as the peak of frequency  $f$  increases.

On evaluating the computational cost of ABCs methods, HABC-Higdon has shown the best performance, since its errors are either close to or smaller than those of the PML in several cases, and its computational cost is lower than the PML, or  
680 Damping with larger extensions. A similar conclusion may be drawn for the FWI applications, where the HABC-Higdon has shown to require less memory usage and wall-clock time than the FWI with PML method. On accounting for computational cost and effectiveness, the tests have indicated that the HABC-Higdon also performs better than the Damping method. To be more specific, Table 4 shows the percent of growth of memory usage and wall-clock time of the Damping method to be higher than those of HABC-Higdon, when the extended domain was increased from  $l_w = 0.67Km$  to  $2.5Km$ . In such case,  
685 the HABC-Higdon with  $l_w = 0.67Km$  was more effective in mitigating reflections than the Damping method with  $l_w = 2.5$ .

Regarding the extension to 3-D problems, previous works (Grote and Sim, 2010; Xie et al., 2014) on PML methods did not report differences in attenuation effectiveness, on going from 2-D to 3-D domain. Owing to the symmetric nature of the acoustic wave propagation, we also expect the effectiveness of the ABCs in 3-D problems to be similar to those shown here. The computational cost, however, may be considerably different, which should, in principle, raise the differences between  
690 them. The computational costs in the 3-D applications may be estimated by using data from Tables 4 and 5. For instance, take the computational cost from Table 5 as a basis, with the third additional dimension, the  $y$  direction of length of  $l_y$ , which is discretized for finite differences for a grid spacing of  $\Delta y$ . In this case, the growth of computational costs of an FWI application (and memory usage) becomes at least  $l_y/\Delta y$  times larger than those of the 2-D using the no-ABC case, damping, and HABC-Higdon. However, with the Damping scheme requiring a larger extension region, the memory savings of the HABC-Higdon  
695 in 3-D problems become even more evident than in the 2-D. With both Damping and HABC-Hybrid schemes, no additional

variables or equations are required, on going from 2 to 3 dimensions, whereas the PML does entail two additional PDEs in that case. This makes the rise in computational costs of the PML even higher when one adds the third dimension, when compared to the corresponding cases of the no-ABC or the HABC-Higdon, as can be seen in Tables 4 and 5.

700 ~~To conclude, while~~ While this work has adopted synthetic velocity models to generate the true seismogram data in the FWI problems, our ~~finds~~ findings regarding the ABCs are expected to hold for real seismograms just as well, since the spurious reflections arise on the computational solver, where artificial outer boundaries are imposed. Hence, they are just as prone to exhibit spurious reflections, as the above tests have shown. ~~To the best of our knowledge, the effects the ABCs may have upon the adjoint problem, and on the FWI thereof, have not yet received attention in the literature. In addition to that, this work contributes to implementing further options of ABCs in Devito.~~ In addition, the velocity model represents a medium where the  
705 wave propagates. Thus, the velocity field affects the angle of incidence at which the wave reaches the truncated boundaries. The ABCs have a good performance when the incidence angle is closer to the normal direction to the truncated boundary, but lose their effectiveness at glancing angles of incidence, i.e. closer to 90 degrees (Gao et al., 2017). In principle, then, any particular model poses its own set of challenges to those techniques. Here, we consider widely used models, such as SEG/EAGE and Marmousi model, as examples of realistic models (Chi et al., 2014; Sun and Demanet, 2020; Zhu et al., 2022; Buchatsky and Treister, 202

710 .  
Since the ABC formulations presented here are available for general wave equations (e.g. elastic/viscouacoustic), the methods can be applied for different physics problems of wave propagation. Komatitsch and Tromp (2003) verified that PML condition is efficient for both pressure ( $P$ ) and shear ( $S$ ) waves. In an anisotropic medium, Dimitri (2007) showed that the CPML methods were efficient to absorb the quasi-pressure wave and the quasi-shear wave. The HABC-A1 and  
715 ~~an HABC approach based on the Higdon method Higdon (1986), that has shown to be more effective, and computational more efficient, than the well-know and used PML method~~ HABC-Higdon are based on A1 Clayton's and Higdon conditions, respectively. Engquist and Majda (1977) and Higdon (1991) evaluated the effectiveness of the ABCs methods for  $P$  and  $S$  waves. So, while not shown here, the ABCs presented in this work should be able to attenuate the spurious reflections generated in the truncated boundaries for other physics problems. Furthermore, previous works (Gao et al., 2017; Engquist and Majda, 1977; Higdon,  
720 indicated that the angle of incidence in which the waves reach the truncated boundaries has more effect on the ABCs' performance than the wave propagation properties. Therefore, we expect that, overall, our results should hold for different physics, as long as they still rely on wave propagation physics.

*Code availability.* The reproducible code can be founded in the following Zenodo directory <https://zenodo.org/record/6003038#.YgKWl3XMJhF>.

*Data availability.* The velocities data sets used in this work were created synthetically (Circle) or obtained in a open data set repository  
725 (Marmousi (Martin et al., 2006) and 2D/SEG EAGE (Aminzadeh and Brac, 1997) [https://wiki.seg.org/wiki/Open\\_data.](https://wiki.seg.org/wiki/Open_data.))

## Appendix A: Formulation of the adjoint equations

This appendix presents the formulation of the adjoint equations for each ABCs methods. To do so, the augmented functional is considered, in which the constraints are given by the wave equation and by the equations used in ABCs.

As shown before, to apply any of the ABCs of interest of this study, the domain considered is built as the union of the physical domain  $\Omega_0$  and the extended domain  $\Omega_e = \Omega/\Omega_0$ . In FWI, the goal is to minimize the objective functional  $I(m)$  on the physical domain  $\Omega_0$ . Therefore, the objective functional remains being defined by the expression (1), but now defined over  $\Omega_0$ .

### A1 Damping

The acoustic wave equation with damping mechanism is given by (6). The corresponding adjoint equations are obtained on pursuing the same sequence presented by Plessix (2006). So, the first step is to write the augmented functional considering the equations defined in the physical and in the extended domains:

$$\mathcal{L}(u, m, u^\dagger) = I(m) - \int_{\tau}^{\Omega} u^\dagger \cdot (mu_{tt} - \nabla^2 u - \zeta u_t - f) dV dt,$$

where  $u = u(\mathbf{x}, t)$  and  $\zeta = \zeta(\mathbf{x})$ .

In the current case, the wave equation with damping mechanism is defined in the domain  $\Omega$  illustrated by the blue region in Fig. 1(b). To obtain the adjoint equation, their initial and boundary conditions, the gradient  $\frac{\partial}{\partial u}[\mathcal{L}(u, u^\dagger, m)]u'$  is written as follows:

$$\lim_{\epsilon \rightarrow 0} \frac{\mathcal{L}(u + \epsilon u', u^\dagger, m) - \mathcal{L}(u, u^\dagger, m)}{\epsilon} = \nabla_u[\mathcal{L}(u, u^\dagger, m)]u' = \nabla_u[I(m)]u' - \int_{\tau}^{\Omega} u^\dagger \cdot (mu'_{tt} - \nabla^2 u' + \zeta u'_t) dV dt,$$

where  $u'$  is a perturbation of the variable  $u$ .

Integration by parts is applied as shown below:

$$\nabla_u[\mathcal{L}(u, u^\dagger, m)]u' = \nabla_u[I(m)]u' - \int_{\tau}^{\Omega} (mu'_{tt} - \nabla^2 u' - \zeta u'_t) \cdot u' dV dt + \mathcal{B},$$

where the gradient  $\nabla_u[I(m)]u'$  is given by:

$$\nabla_u[I(m)]u' = \int_{\tau}^{\Omega} (u - u^o)u' \delta(\mathbf{x} - \bar{\mathbf{x}}) dV dt. \tag{A1}$$

The term  $\mathcal{B}$  is the bilinear concomitant, which the integration by parts entails. After applying the Divergence Theorem,  $\mathcal{B}$  reads:

$$\mathcal{B} = \mathcal{B}(u', u^\dagger, m) = \int_{\tau}^{\int_{\partial(\Omega)}} [(-u^\dagger \nabla u' + \nabla u^\dagger u')] \cdot \mathbf{n} dS dt + \int_{\Omega} \left[ m (u^\dagger \cdot u'_t - u^\dagger_t u') - \zeta u^\dagger u' \right] dV \Big|_{t_0}^{t_f}.$$

The adjoint wave equation, their initial and boundary conditions, are then defined by imposing  $\nabla_u[\mathcal{L}(u, u^\dagger, m)]u' = 0$ . That means defining the adjoint equation as follows:

$$mu_{tt}^\dagger - \nabla^2 u^\dagger + \zeta u_t^\dagger = (u - u^o)\delta(\mathbf{x} - \check{\mathbf{x}}) \forall \mathbf{x} \in \Omega. \quad (\text{A2})$$

755 Also, on considering the boundary and initial conditions of the forward wave equation, and by imposing the adjoint boundary conditions given by:

$$u^\dagger = 0, \quad \forall \mathbf{x} \in \partial\Omega_i, \quad i = 1, 2, 3, \quad (\text{A3})$$

$$\frac{\partial u^\dagger}{\partial z} = 0, \quad \forall \mathbf{x} \in \partial\Omega_4, \quad (\text{A4})$$

The bilinear concomitant is reduced to:

$$\mathcal{B} = \mathcal{B}(u', u^\dagger, m) = \int_{\Omega} \left[ m(u^\dagger \cdot u'_t - u_t^\dagger u') - \zeta u^\dagger u' \right] dV \Bigg|_{t_0}^{t_f}.$$

760 The homogeneous initial conditions of the forward wave equation drive the domain integral to zero, that is evaluated at  $t_0 = 0$ . In order to eliminate the corresponding domain integral for  $t = t_f$ , one could impose the following homogeneous final conditions on the adjoint variable:  $u^\dagger$ :

$$u^\dagger(\mathbf{x}, t_f) = u_t^\dagger(\mathbf{x}, t_f) = 0 \quad (\text{A5})$$

To make the algebra simpler with respect to these conditions, one could define an adjoint time variable in the form

$$765 \quad t^\dagger \equiv t_f - t \quad \Rightarrow \quad dt^\dagger = -dt \quad \Rightarrow$$

$$\Rightarrow \begin{cases} t = 0 \Leftrightarrow t^\dagger = t_f \\ t = t_f \Leftrightarrow t^\dagger = 0 \end{cases} \quad \Rightarrow \quad u^\dagger(\mathbf{x}, t_f) = u_t^\dagger(\mathbf{x}, t_f) = 0.$$

As a result of this change of variables, the adjoint wave equation (A2) becomes, in its final form:

$$mu_{tt}^\dagger - \nabla^2 u^\dagger - \zeta u_t^\dagger = (u - u^o)\delta(\mathbf{x} - \check{\mathbf{x}}) \forall \mathbf{x} \in \Omega, \quad (\text{A6})$$

which means it is a self-adjoint wave equation.

## 770 A2 PML and CPML

The work of Xie et al. (2014) presents a mathematical development to obtain the adjoint wave system with the refereed complex-frequency-shifted unsplit-field perfectly matched layer (CFS-UPML). In essence, the Fourier transform  $\hat{u} = \int_{-\infty}^{\infty} e^{st} u(\mathbf{x}, t) dt$  of the displacement vector,  $u$ , satisfies the Helmholtz equation:

$$s^2 \hat{u} = \nabla(c^2 \nabla \hat{u}) \quad (\text{A7})$$

775 where  $s \in \mathcal{C}$ . Also, one considers the transform of spatial coordinates  $\mathbf{x}$ :

$$\tilde{\mathbf{x}} := \int_{\Omega} \gamma(\mathbf{x}) d\mathcal{V}.$$

where, for the 2-D case,  $\gamma(\mathbf{x}) = [\gamma_1, \gamma_2]^T = [\gamma_1(\mathbf{x}), \gamma_2(\mathbf{x})]^T$  is the complex stretching function,

$$\gamma_j = \kappa_j + \frac{\zeta_j}{\alpha_j + is}, \quad j = 1, 2 \quad \text{for 2-D case}$$

and  $i = \sqrt{-1}$ .

780 The next step consists in reformulating eq. (A7) in time domain. In the 2-D case, it leads to:

$$\begin{aligned} mL(t) * u &= \\ &= \frac{\partial}{\partial x} \left( \mathcal{F}^{-1} \left( \frac{\gamma_2}{\gamma_1} \right) * u_x \right) + \frac{\partial}{\partial z} \left( \mathcal{F}^{-1} \left( \frac{\gamma_1}{\gamma_2} \right) * u_z \right) + f, \end{aligned} \quad (\text{A8})$$

where  $L(t) = \mathcal{F}^{-1}(s^2 \gamma_1 \gamma_2)$ ,  $\mathcal{F}^{-1}$  is the inverse Fourier transform, and  $*$  represents a convolution.

On taking the wave equation (A8) into account, the adjoint system is then defined as (Xie et al., 2014):

$$\begin{aligned} 785 \quad mL(t) * u^\dagger &= \frac{\partial}{\partial x} \left( \mathcal{F}^{-1} \left( \frac{\gamma_2}{\gamma_1} \right) * u_x^\dagger \right) + \\ &+ \frac{\partial}{\partial z} \left( \mathcal{F}^{-1} \left( \frac{\gamma_1}{\gamma_2} \right) * u_z^\dagger \right) + (u - u^o) \delta(\mathbf{x} - \tilde{\mathbf{x}}), \end{aligned} \quad (\text{A9})$$

which satisfies the conditions (A3), (A4) and (A5).

In the standard PML formulation,  $\alpha_j = 0$ ,  $\kappa_j = 1$  (Berenger et al., 1994). Therefore, the adjoint wave equation with PML is a particular case of the methodology presented by Xie et al. (2014). Hence, for the 2-D case the convolutions of the adjoint

790 wave equation (A9) are given by:

$$L(t) * u^\dagger = u_{tt}^\dagger + (\zeta_1 + \zeta_2) u_t^\dagger + \zeta_1 \zeta_2 u^\dagger, \quad (\text{A10})$$

$$\mathcal{F}^{-1} \left( \frac{\gamma_2}{\gamma_1} \right) * u_x^\dagger = u_x^\dagger - (\zeta_1 - \zeta_2) [\exp^{-\zeta_1 t} H(t)] * u_x^\dagger, \quad (\text{A11})$$

$$\mathcal{F}^{-1} \left( \frac{\gamma_1}{\gamma_2} \right) * u_z^\dagger = u_z^\dagger - (\zeta_2 - \zeta_1) [\exp^{-\zeta_2 t} H(t)] * u_z^\dagger, \quad (\text{A12})$$

where  $H(t)$  is the Heaviside distributions.

795 The convolution terms  $(\zeta_1 - \zeta_2) [\exp^{-\zeta_1 t} H(t)] * u_x^\dagger$  and  $(\zeta_2 - \zeta_1) [\exp^{-\zeta_2 t} H(t)] * u_z^\dagger$  may be solved by considering auxiliary differential equations (Grote and Sim, 2010; Xie et al., 2014). On defining the auxiliary functions as

$$\phi_1^\dagger = (\zeta_1 - \zeta_2) [\exp^{-\zeta_1 t} H(t)] * u_x^\dagger,$$

$$\phi_2^\dagger = (\zeta_2 - \zeta_1) [\exp^{-\zeta_2 t} H(t)] * u_z^\dagger,$$



the terms (A11) and (A12) are rewritten as:

$$800 \quad \mathcal{F}^{-1} \left( \frac{\gamma_2}{\gamma_1} \right) * u_x^\dagger = u_x^\dagger - \phi_1^\dagger, \quad \mathcal{F}^{-1} \left( \frac{\gamma_1}{\gamma_2} \right) * u_z^\dagger = u_z^\dagger - \phi_2^\dagger.$$

Therefore, the adjoint wave equation (A9) with the employment of PML method reads:

$$m u_{tt}^\dagger + (\zeta_1 + \zeta_2) u_t^\dagger + \zeta_1 \zeta_2 u^\dagger = \nabla^2 u^\dagger + (\phi_1^\dagger)_x + (\phi_2^\dagger)_z + (u - u^o) \delta(\mathbf{x} - \tilde{\mathbf{x}}), \quad (\text{A13})$$

where the auxiliary functions  $\phi_1^\dagger$  and  $\phi_2^\dagger$  satisfy the respective auxiliary differential equations:

$$(\phi_1^\dagger)_t = -\zeta_1 \phi_1^\dagger + (\zeta_2 - \zeta_1) u_x^\dagger, \quad (\text{A14})$$

$$805 \quad (\phi_2^\dagger)_t = -\zeta_2 \phi_2^\dagger + (\zeta_1 - \zeta_2) u_z^\dagger, \quad (\text{A15})$$

The adjoint wave equation (A9) may be also written according to the formulation presented in Pasalic and McGarry (2010), i.e., CPML formulation. In this case,  $\alpha_j$  is a positive value, and  $\kappa_j = 1$  (Pasalic and McGarry, 2010). Therefore, to write an adjoint system with CPML method, eq. (A9) is rewritten as:

$$810 \quad m \mathcal{F}^{-1}(s^2) * u^\dagger = \mathcal{F}^{-1} \left( \frac{1}{\gamma_1} \right) * \frac{\partial}{\partial x} \left( \mathcal{F}^{-1} \left( \frac{1}{\gamma_1} \right) * u_x^\dagger \right) + \\ + \mathcal{F}^{-1} \left( \frac{1}{\gamma_2} \right) * \frac{\partial}{\partial z} \left( \mathcal{F}^{-1} \left( \frac{1}{\gamma_2} \right) * u_z^\dagger \right) + (u - u^o) \delta(\mathbf{x} - \tilde{\mathbf{x}}), \quad (\text{A16})$$

where  $\mathcal{F}^{-1}(s^2) * u^\dagger = u_{tt}^\dagger$  and, on following Pasalic and McGarry (2010), we have:

$$\mathcal{F}^{-1} \left( \frac{1}{\gamma_1} \right) * \frac{\partial}{\partial x} \left( \mathcal{F}^{-1} \left( \frac{1}{\gamma_1} \right) * u_x^\dagger \right) = u_{xx}^\dagger + (\phi_1^\dagger)_x + (\psi_1^\dagger)_x$$

$$\mathcal{F}^{-1} \left( \frac{1}{\gamma_2} \right) * \frac{\partial}{\partial z} \left( \mathcal{F}^{-1} \left( \frac{1}{\gamma_2} \right) * u_z^\dagger \right) = u_{zz}^\dagger + (\phi_2^\dagger)_z + (\psi_2^\dagger)_z.$$

815 Therefore, the adjoint wave equation (A16) is cast in the form:

$$m u_{tt}^\dagger = \nabla^2 u^\dagger + (\psi_1^\dagger)_x + (\psi_2^\dagger)_z + \phi_1^\dagger + \phi_2^\dagger + (u - u^o) \delta(\mathbf{x} - \tilde{\mathbf{x}}), \quad (\text{A17})$$

where the auxiliary functions  $(\psi_1^\dagger, \psi_2^\dagger, \phi_1^\dagger, \phi_2^\dagger)$  are obtained by using the auxiliary equations given by:

$$\psi_1^\dagger(\mathbf{x}, t_{n-1}) = a_1(\mathbf{x}) \psi_1^\dagger(\mathbf{x}, t_n) + b_1(x, z) u_x^\dagger(\mathbf{x}, t_{n-1}), \quad (\text{A18})$$

$$\psi_2^\dagger(\mathbf{x}, t_{n-1}) = a_2(\mathbf{x}) \psi_2^\dagger(\mathbf{x}, t_n) + b_2(\mathbf{x}) u_z^\dagger(\mathbf{x}, t_{n-1}), \quad (\text{A19})$$

$$820 \quad \phi_1^\dagger(\mathbf{x}, t_{n-1}) = \bar{a}_1(\mathbf{x}) \phi_1^\dagger(\mathbf{x}, t_n) + b_1(\mathbf{x}) \left[ u_{xx}^\dagger(\mathbf{x}, t_{n-1}) + \psi_{1,x}^\dagger(\mathbf{x}, t_{n-1}) \right], \quad (\text{A20})$$

$$\phi_2^\dagger(\mathbf{x}, t_{n-1}) = \bar{a}_2(\mathbf{x}) \phi_2^\dagger(\mathbf{x}, t_n) + b_2(\mathbf{x}) \left[ u_{zz}^\dagger(\mathbf{x}, t_{n-1}) + \psi_{2,z}^\dagger(\mathbf{x}, t_{n-1}) \right]. \quad (\text{A21})$$

### A3 Hybrid Absorbing Boundary Condition (HABC)

825 The HABC methods apply the discrete convex combination (25) to a discrete transitional area of  $\Omega_e$ . As explained in section 3.5, this approach combines the solution of the wave equation with the boundary conditions A1 Clayton's condition for HABC-A1, and Higdon for HABC-Higdon. So, to derive the adjoint equations, let us start by considering boundary conditions on the truncated boundaries ( $\partial\Omega_{i_0}$ ,  $i_0 = 1, 2, 3$ ) that satisfy the A1 Clayton's. In this case, the augmented functional is given by (3).

On integrating it by parts, one arrives at:

$$\nabla_u[\mathcal{L}(u, u^\dagger, m)]u' = \nabla_u[I(m)]u' - \int_{\tau} \int_{\Omega} (mu_{tt}^\dagger - \nabla^2 u^\dagger) \cdot u' dV dt + \mathcal{B},$$

830 where the adjoint wave equation is defined by (5), reaching  $\nabla_u[\mathcal{L}(u, u^\dagger, m)]u' = \mathcal{B}$ . On adopting the boundary condition at the free surface (A4), and zero initial conditions of the forward and adjoint variables, it yields:

$$\nabla_u[\mathcal{L}(u, u^\dagger, m)]u' = - \int_{\tau} \int_{\partial\Omega_{i_0}} [-u^\dagger(\nabla u') + \nabla u^\dagger u'] \cdot \mathbf{n} dS dt. \quad (\text{A22})$$

In the truncated boundaries,  $\partial\Omega_{i_0}$ , A1 Clayton's boundary condition reads

$$\frac{1}{c} \frac{\partial u'}{\partial t} + \nabla u' \cdot \mathbf{n} = 0,$$

835 which implies  $\nabla u' \cdot \mathbf{n} = -\frac{1}{c} \frac{\partial u'}{\partial t}$ . Hence, the right side term of eq. (A22) is rewritten as:

$$- \int_{\tau} \int_{\partial\Omega_{i_0}} -u^\dagger \left( -\frac{1}{c} \frac{\partial u'}{\partial t} \right) + (\nabla u^\dagger u') \cdot \mathbf{n} dS dt.$$

Next, the integration by parts with respect to time can be applied and eq. (A22) becomes:

$$\frac{\partial}{\partial u}[\mathcal{L}(u, u^\dagger, m)]u' = - \int_{\tau} \int_{\partial\Omega_{i_0}} \frac{1}{c} \frac{\partial u^\dagger}{\partial t} u' + (\nabla u^\dagger u') \cdot \mathbf{n} dS dt,$$

840 since  $u(\mathbf{x}, 0) = u^\dagger(\mathbf{x}, t_f) = 0.0 \forall \mathbf{x} \in \Omega$  is satisfied. Lastly, on imposing  $\frac{1}{c} \frac{\partial u^\dagger}{\partial t} + \nabla u^\dagger \cdot \mathbf{n} = 0$ , the extremum  $\frac{\partial}{\partial u}[\mathcal{L}(u, u^\dagger, m)]u' = 0$  is then realized.

The same approach may be employed to obtain the adjoint wave equation in the case where the Higdon boundary condition is imposed on the truncated boundaries  $\partial\Omega_{i_0}$ . Therefore, the adjoint wave equation is defined by eq. (5). Also, on imposing the boundary condition at the free surface (A4), zero initial conditions for the forward ( $u$ ) and adjoint ( $u^\dagger$ ) variables, the gradient is reduced to eq. (A22). So, based on Higdon (1986), Higdon's boundary condition was proposed by considering

845 the wave propagating outward at an angle of incidence  $\alpha$ . In a two-dimensional domain, the wave solution was described by  $u = f(x \cos \alpha + y \sin \alpha + ct)$ . Hence, the generalized boundary condition is

$$\prod_{j=1}^p \left( \cos(\alpha_j) \left( \frac{1}{c} \frac{\partial}{\partial t} - (\mathbf{n} \cdot \nabla) \right) u(\mathbf{x}, t) \right) = 0, \quad (\text{A23})$$

such that  $|\alpha| \leq \frac{\pi}{2}$  for all  $j$ . That allows to write  $\nabla u' \cdot \mathbf{n} = -\cos \alpha \frac{1}{c} \frac{\partial u'}{\partial t}$ , and the eq. (A22) as follows:

$$\frac{\partial}{\partial u} [\mathcal{L}(\mathbf{u}, \mathbf{u}^\dagger, m)] u' = - \int_{\tau} \int_{\partial \Omega_{i_0}} u^\dagger \left( \cos \alpha \frac{1}{c} \frac{\partial u'}{\partial t} \right) + (\nabla u^\dagger u') \cdot \mathbf{n} dS dt.$$

850 On integrating it by parts in time, the above equation becomes :

$$\frac{\partial}{\partial u} [\mathcal{L}(\mathbf{u}, \mathbf{u}^\dagger, m)] u' = - \int_{\tau} \int_{\partial \Omega_{i_0}} \cos \alpha \frac{1}{c} \frac{\partial u^\dagger}{\partial t} u' - (\nabla u^\dagger u') \cdot \mathbf{n} dS dt.$$

As a result of it, on imposing  $\cos \alpha \frac{1}{c} \frac{\partial u^\dagger}{\partial t} - \nabla u^\dagger = 0$ , the extreme  $\frac{\partial}{\partial u} [\mathcal{L}(\mathbf{u}, \mathbf{u}^\dagger, m)] u' = 0$  is attained and the generalization

$$\prod_{j=1}^p \left( \cos(\alpha_j) \left( \frac{1}{c} \frac{\partial}{\partial t} - (\mathbf{n} \cdot \nabla) \right) u^\dagger(\mathbf{x}, t) \right) = 0, \quad (\text{A24})$$

may be imposed as boundary conditions on the adjoint wave problem.

855 *Author contributions.* Dolci, Daiane I.: Conceptualization, Methodology, Software, Investigation, Writing–Original draft preparation  
 Silva, Felipe .A.G: Conceptualization, Methodology, Software, Validation, Writing–Original draft preparation  
 Peixoto, Pedro S.: Supervision, Writing–Reviewing and Editing Review, Resources, Funding acquisition;  
 Volpe, Ernani V.: Supervision, Writing–Reviewing and Editing Review, Resources, Funding acquisition.

860 *Competing interests.* The authors report no conflict of interest.

*Acknowledgements.* This research was carried out in association with the ongoing R& D project registered as ANP 20714-2 *STMI - Software Technologies for Modelling and Inversion, with applications in seismic imaging* (USP/Shell Brasil/ANP).

The authors would also like to acknowledge and express their deepest appreciation for the invaluable contribution the late Prof. Saulo R. M. de Barros (\*1958 – †2021 ) has made to this work. Prof. Saulo has done so much for our research. Sadly, though, he did not live to see its

865 bearing fruit.

## References

- A. Fichtner, H.-P. Bunge, H. I.: The adjoint method in seismology: I. Theory, *Physics of the Earth and Planetary Interiors*, 157, 86–104, <https://doi.org/10.1016/j.pepi.2006.03.016>, 2006.
- Abubakar, A., Hu, W., Habashy, T. M., and Van den Berg, P.: Application of the finite-difference contrast-source inversion algorithm to seismic full-waveform data, *GEOPHYSICS*, 74, <https://doi.org/doi.org/10.1190/1.3250203>, 2009.
- Aghamiry, H. S., Gholami, A., and Operto, S.: Improving full-waveform inversion by wavefield reconstruction with the alternating direction method of multipliers, *GEOPHYSICS*, 84, <https://doi.org/doi.org/10.1190/geo2018-0093.1>, 2019.
- Aminzadeh, F. and Brac, J. ad Kunz, T.: *SEG/EAGE 3-D Salt and Overthrust Models*, 1, Distribution CD of Salt and Overthrust models, SEG book series., 1997.
- 875 Asnaashari, A., Brossier, R., Garambois, S., Audebert, F., Thore, P., and Virieux, J.: Regularized seismic full waveform inversion with prior model information, *GEOPHYSICS*, 78, <https://doi.org/doi.org/10.1190/geo2012-0104.1>, 2012.
- Ben-Hadj-Ali, S., Operto, S., and Virieux, J.: An efficient frequency-domain full waveform inversion method using simultaneous encoded sources, *GEOPHYSICS*, 76, <https://doi.org/doi.org/10.1190/1.3581357>, 2011.
- Berenger, J.-P. et al.: A perfectly matched layer for the absorption of electromagnetic waves, *Journal of computational physics*, 114, 185–200, <https://doi.org/doi:10.1006/jcph.1994.1159>, 1994.
- 880 Buchatsky, S. and Treister, E.: Full waveform inversion using extended and simultaneous sources, *SIAM Journal on Scientific Computing*, 43, S862–S883, <https://doi.org/doi.org/10.1137/20M1349412>, 2021.
- Bunks, C., Saleck, F. M., Zaleski, S., and Chavent, G.: Multiscale seismic waveform inversion, *GEOPHYSICS*, 60, 1457–1473, <https://doi.org/doi.org/10.1190/1.1443880>, 1995.
- 885 Byrd, R. H., Lu, P., Nocedal, J., and Zhu, C.: A limited memory algorithm for bound constrained optimization, *SIAM Journal on Scientific and Statistical Computing*, 16, 1190–1208, <https://doi.org/doi.org/10.1137/0916069>, 1995.
- Chi, B., Dong, L., and Liu, Y.: Full waveform inversion method using envelope objective function without low frequency data, *Journal of Applied Geophysics*, 109, 36–46, <https://doi.org/doi.org/10.1016/j.jappgeo.2014.07.010>, 2014.
- Clayton, R. and Engquist, B.: Absorbing boundary conditions for acoustic and elastic wave equations, *Bulletin of the seismological society of America*, 67, 1529–1540, <https://doi.org/doi.org/10.1785/BSSA0670061529>, 1977.
- 890 Dimitri, K.: An unsplit convolutional perfectly matched layer improved at grazing incidence for the seismic wave equation, *Geophysics*, 72, 255–167, <https://doi.org/Doi:10.1190/1.2757586>, 2007.
- Engquist, B. and Majda, A.: Absorbing boundary conditions for numerical simulation of waves, *Proceedings of the National Academy of Sciences*, 74, 1765–1766, <https://doi.org/doi:10.1073/pnas.74.5.1765>, 1977.
- 895 Fichtner, A.: *Full seismic waveform modelling and inversion*, Springer Science & Business Media, 2010.
- Fornberg, B.: Generation of finite difference formulas on arbitrarily spaced grids, *Mathematics of computation*, 51, 699–706, 1988.
- Gao, Y., Song, H., Zhang, J., and Yao, Z.: Comparison of artificial absorbing boundaries for acoustic wave equation modelling, *Exploration Geophysics*, 48, 76–93, <https://doi.org/doi:10.1071/EG15068>., 2017.
- Grote, M. J. and Sim, S.: Efficient pml for the wave equation, *arXiv preprint arXiv*, <https://doi.org/doi.org/10.48550/arXiv.1001.0319>, 2010.
- 900 Higdon, R. L.: Absorbing boundary conditions for difference approximations to the multidimensional wave equation, *Mathematics of computation*, 47, 437–459, <https://doi.org/doi.org/10.2307/2008166>, 1986.

- Higdon, R. L.: Numerical absorbing boundary conditions for the wave equation, *Mathematics of computation*, 49, 65–90, <https://doi.org/doi:10.1090/S0025-5718-1987-0890254-1>, 1987.
- Higdon, R. L.: Absorbing boundary conditions for elastic waves, *Geophysics*, 56, 231–241, <https://doi.org/doi:10.1190/1.1443035>, 1991.
- 905 Kaltenbacher, B., Kaltenbacher, B., and Sim, I.: A modified and stable version of a perfectly matched layer technique for the 3-d second order wave equation in time domain with an application to aeroacoustics, *J. Comput. Phys.*, 235, 407–422, <https://doi.org/doi.org/10.1016/j.jcp.2012.10.016>, 2013.
- Komatitsch, D. and Tromp, J.: A perfectly matched layer absorbing boundary condition for the second-order seismic wave equation, *Geophysical Journal International*, 154, 146–153, <https://doi.org/doi:10.1046/j.1365-246X.2003.01950.x>, 2003.
- 910 Kukreja, N., Louboutin, M., Vieira, F., Luporini, F., Lange, M., and Gorman, G.: Devito: Automated fast finite difference computation, in: 2016 Sixth International Workshop on Domain-Specific Languages and High-Level Frameworks for High Performance Computing (WOLFHPC), pp. 11–19, IEEE, <https://doi.org/10.1109/WOLFHPC.2016.06>, 2016.
- Liu, Y. and Sen, M. K.: A hybrid scheme for absorbing edge reflections in numerical modeling of wave propagation, *Geophysics*, 75, A1–A6, <https://doi.org/doi:10.1190/1.3295447>, 2010.
- 915 Liu, Y. and Sen, M. K.: A hybrid absorbing boundary condition for elastic staggered-grid modelling, *Geophysical Prospecting*, 60, 1114–1132, <https://doi.org/doi:10.1111/j.1365-2478.2011.01051.x>, 2012.
- Liu, Y. and Sen, M. K.: An improved hybrid absorbing boundary condition for wave equation modeling, *Journal of Geophysics and Engineering*, 15, 2602–2613, <https://doi.org/doi.org/10.1088/1742-2140/aadd31>, 2018.
- Louboutin, M., Lange, M., Luporini, F., Kukreja, N., Witte, P. A., Herrmann, F. J., Velesko, P., and Gorman, G. J.: Devito (v3.1.0): an  
 920 embedded domain-specific language for finite differences and geophysical exploration, *Geoscientific Model Development*, 12, 1165–1187, <https://doi.org/10.5194/gmd-12-1165-2019>, 2019.
- Luporini, F., Lange, M., Louboutin, M., Kukreja, N., Hüchelheim, J., Yount, C., Witte, P., Kelly, P. H. J., Herrmann, F. J., and Gorman, G. J.: Architecture and performance of Devito, a system for automated stencil computation, *CoRR*, abs/1807.03032, <http://arxiv.org/abs/1807.03032>, 2018.
- 925 Martin, G. S., Wileya, R., and Kurt, J.: Marmousi2 : An elastic upgrade for Marmousi, *The Leading Edge*, 25, 156–166, <https://doi.org/doi.org/10.1190/1.2172306>, 2006.
- Mora, P.: Nonlinear two-dimensional elastic inversion of multioffset seismic data, *Geophysics*, 52, n.9, 1211, <https://doi.org/doi.org/10.1190/1.1442384>, 1987.
- Pasalic, D. and McGarry, R.: Convolutional perfectly matched layer for isotropic and anisotropic acoustic wave equations, in: *SEG Technical  
 930 Program Expanded Abstracts 2010*, pp. 2925–2929, Society of Exploration Geophysicists, <https://doi.org/doi.org/10.1190/1.3513453>, 2010.
- Plessix, R.-E.: A review of the adjoint-state method for computing the gradient of a functional with geophysical applications, *Geophys. J. Int.*, 167, 495–503, <https://doi.org/doi.org/10.1111/j.1365-246X.2006.02978.x>, 2006.
- Ricker, N.: The form and nature of seismic waves and the structure of seismograms, *Geophysics*, 5, 348–366,  
 935 <https://doi.org/doi.org/10.1190/1.1441816>, 1940.
- Sochacki, J., Kubichek, R., George, J., Fletcher, W., and Smithson, S.: Absorbing boundary conditions and surface waves, *Geophysics*, 52, 60–71, <https://doi.org/doi:10.1190/1.1442241>, 1987.
- Sun, H. and Demanet, L.: Extrapolated full-waveform inversion with deep learning EFWI-CNN, *Geophysics*, 85, R275–R288, <https://doi.org/doi.org/10.1190/geo2019-0195.1>, 2020.

- 940 Tarantola, A.: Inversion of seismic reflection data in the acoustic approximation, *GEOPHYSICS*, 49, 1259–1266, <https://doi.org/doi.org/10.1190/1.1441754>, 1984.
- Tarantola, A.: A strategy for nonlinear elastic inversion of seismic reflection data, *GEOPHYSICS*, 51, 1893–1903, <https://doi.org/10.1190/1.1442046>, 1986.
- 945 Tarantola, A.: Theoretical background for the inversion of seismic waveforms including elasticity and attenuation, *Pure and Applied Geophysics PAGEOPH*, 128, n. 1–2, 365–399, <https://doi.org/10.1007/BF01772605>, 1988.
- Virieux, J. and Operto, S.: An overview of full-waveform inversion in exploration geophysics, *GEOPHYSICS*, 74, <https://doi.org/doi.org/10.1190/1.3238367>, 2009.
- Xie, Z., Komatitsch, D., Martin, R., and Matzen, R.: Improved forward wave propagation and adjoint-based sensitivity kernel calculations using a numerically stable finite-element PML, *Geophysical Journal International*, 198, 1714–1747, <https://doi.org/doi:10.1093/gji/ggu219>,  
950 2014.
- Zhu, W., Xu, K., Darve, E., Biondi, B., and Beroza, G. C.: Integrating deep neural networks with full-waveform inversion: Reparameterization, regularization, and uncertainty quantification, *Geophysics*, 87, R93–R109, <https://doi.org/doi.org/10.1190/geo2020-0933.1>, 2022.
